# Supplementary material for: “Noncovalent Interaction”: A Chemical Misnomer That Inhibits Proper Understanding of Hydrogen Bonding, Rotation Barriers, and Other Topics
Source: MDPI journal article supplement (doi:10.3390/molecules28093776), 2023-04-27
Supplement: s1 [file s1]

# SUPPLEMENTARY INFORMATION: “Noncovalent Interaction”: A Chemical Misnomer that Inhibits Proper Understanding of Hydrogen Bonding, Rotation Barriers, and Other Topics

F. Weinhold\*

*Theoretical Chemistry Institute and Department of Chemistry,  
University of Wisconsin-Madison, Madison, Wisconsin 53706, USA*

## INTRODUCTION

This SI file consists of ready-to-run *Gaussian 16* input files, each containing optimized geometrical coordinates as well as extended “title” sections summarizing vibrational frequencies, thermochemical values, and other calculated properties, followed by \$NBO...\$END keylist input with selected analysis keywords. Following the plan of the paper, the SI file is divided into separate “**HYDROGEN BONDING**,” “**ROTATION BARRIER**,” and “**STERIC REPULSION**” sections. Each section includes the input files for ordinary optimizations (“pop=nbo7read”) followed by those for \$DEL-deletion optimizations (“pop=nbo7del”). These files serve to re-generate all numerical values and graphical PLOT files (as displayed in the orbital images generated by the *NBOPro7@jmol* program) of the main paper.

## HYDROGEN BONDING

```
%mem=2gb
%nprocshared=8
%chk=fh
#b3lyp/6-311++g** opt=calcall polar pop=nbo7read
FH, E=-100.482383390 (dE= )
nu: 4098
Vibrational temperatures: 5895.45
(Kelvin)
Zero-point correction= 0.009335 (Hartree/Particle)
Thermal correction to Energy= 0.011695
Thermal correction to Enthalpy= 0.012640
Thermal correction to Gibbs Free Energy= -0.007072
Sum of electronic and zero-point Energies= -100.473048
Sum of electronic and thermal Energies= -100.470688
Sum of electronic and thermal Enthalpies= -100.469744
Sum of electronic and thermal Free Energies= -100.489455
Total dipole moment 0.00 0.00 -1.98 1.98 0.00 0.00 -1.98 1.98
0 1
F
H 1 0.9222
$nbO file=fh dipole $end
--Link1--
%mem=2gb
%nprocshared=8
%chk=clh
#b3lyp/6-311++g** opt=calcall polar pop=nbo7read
ClH, E=-460.834022055 (dE= )
nu: 2934
Vibrational temperatures: 4222.04
```

```

(Kelvin)
Zero-point correction= 0.006685 (Hartree/Particle)
Thermal correction to Energy= 0.009046
Thermal correction to Enthalpy= 0.009990
Thermal correction to Gibbs Free Energy= -0.011204
Sum of electronic and zero-point Energies= -460.827337
Sum of electronic and thermal Energies= -460.824976
Sum of electronic and thermal Enthalpies= -460.824032
Sum of electronic and thermal Free Energies= -460.845226
Total dipole moment 0.00 0.00 -1.40 1.40 0.00 0.00 -1.40 1.40
0 1
Cl
H 1 1.2869
$nb0 file=clh dipole $end
--Link1--
%mem=2gb
%nprocshared=8
%chk=brh
#b3lyp/6-311++g** opt=calcall polar pop=nbo7read
BrH, E=-2574.75317353 (dE= )
nu: 2605
Vibrational temperatures: 3747.31
(Kelvin)
Zero-point correction= 0.005934 (Hartree/Particle)
Thermal correction to Energy= 0.008294
Thermal correction to Enthalpy= 0.009238
Thermal correction to Gibbs Free Energy= -0.013296
Sum of electronic and zero-point Energies= -2574.747240
Sum of electronic and thermal Energies= -2574.744880
Sum of electronic and thermal Enthalpies= -2574.743935
Sum of electronic and thermal Free Energies= -2574.766470
Total dipole moment 0.00 0.00 -1.08 1.08 0.00 0.00 -1.08 1.08
0 1
Br
H 1 1.4273
$nb0 file=brh dipole $end
--Link1--
%mem=2gb
%nprocshared=8
%chk=hh
#b3lyp/6-311++g** opt=calcall polar pop=nbo7read
HH, E=-1.17957156591 (dE= )
nu: 4418
Vibrational temperatures: 6356.61
(Kelvin)
Zero-point correction= 0.010065 (Hartree/Particle)
Thermal correction to Energy= 0.012426
Thermal correction to Enthalpy= 0.013370
Thermal correction to Gibbs Free Energy= -0.001426
Sum of electronic and zero-point Energies= -1.169506
Sum of electronic and thermal Energies= -1.167146
Sum of electronic and thermal Enthalpies= -1.166202
Sum of electronic and thermal Free Energies= -1.180997
Total dipole moment 0.00 0.00 0.00 0.00 0.00 0.00 0.00 0.00
0 1
H
H 1 0.7442
$nb0 file=hh dipole $end
--Link1--
%mem=2gb
%nprocshared=8
%chk=hh_brh
#b3lyp/6-311++g** opt=calcall polar pop=nbo7read
HH...BrH, E=-2575.93273798 (dE=+0.0048)
FH, E=-100.482383390 (dE= )
ClH, E=-460.834022055 (dE= )
BrH, E=-2574.75317353 (dE= )
HH, E=-1.17957156591 (dE= )
nu: 27,31,111
Vibrational temperatures: 39.44 44.05 159.13 185.11 3748.13
(Kelvin) 6350.97

```

```

Zero-point correction=                0.016668 (Hartree/Particle)
Thermal correction to Energy=         0.022656
Thermal correction to Enthalpy=       0.023600
Thermal correction to Gibbs Free Energy= -0.012760
Sum of electronic and zero-point Energies= -2575.916070
Sum of electronic and thermal Energies= -2575.910082
Sum of electronic and thermal Enthalpies= -2575.909138
Sum of electronic and thermal Free Energies= -2575.945498
  1. HBr                1.09 -0.01  0.00  1.09    1.21 -0.04  0.00  1.21
                        deloc: -0.12  0.03  0.00  0.12
  2. H2                 0.00  0.02  0.00  0.02    0.00  0.02  0.00  0.02
0 1
      35                0.000000    0.217550    0.000000
      1                1.426926    0.186963    0.000000
      1               -0.750089   -4.270970    0.000000
      1               -0.676837   -3.530234    0.000000
$nb0 file=hh_brh archive nrt plot dipole $end
--Link1--
%mem=2gb
%nprocshared=8
%chk=hh_clh
#b3lyp/6-311++g** opt=calcall polar pop=nbo7read
HH...ClH, E=-462.013704938 (dE=-0.07)
FH, E=-100.482383390 (dE= )
ClH, E=-460.834022055 (dE= )
BrH, E=-2574.75317353 (dE= )
HH, E=-1.17957156591 (dE= )
nu: 40,64,146,...
Vibrational temperatures:    57.31    91.51   210.01   234.60  4220.29
                             (Kelvin)  6348.10
Zero-point correction=                0.017674 (Hartree/Particle)
Thermal correction to Energy=         0.023441
Thermal correction to Enthalpy=       0.024385
Thermal correction to Gibbs Free Energy= -0.009072
Sum of electronic and zero-point Energies= -461.996031
Sum of electronic and thermal Energies= -461.990264
Sum of electronic and thermal Enthalpies= -461.989320
Sum of electronic and thermal Free Energies= -462.022777
  1. HCl                1.41 -0.12  0.00  1.41    1.57 -0.18  0.00  1.58
                        deloc: -0.17  0.06  0.00  0.18
  2. H2                 0.00  0.03  0.00  0.03    0.00  0.03  0.00  0.03
0 1
      17                0.000000    0.380003   -0.000000
      1                1.280477    0.250120   -0.000000
      1               -0.658932   -3.726854    0.000000
      1               -0.621544   -2.983324    0.000000
$nb0 file=hh_clh archive nrt plot dipole $end
--Link1--
%mem=2gb
%nprocshared=8
%chk=hh_fh
#b3lyp/6-311++g** opt=calcall polar pop=nbo7read
HH...FH, E=-101.662377949 (dE=-0.27)
FH, E=-100.482383390 (dE= )
ClH, E=-460.834022055 (dE= )
BrH, E=-2574.75317353 (dE= )
HH, E=-1.17957156591 (dE= )
nu: 79,116,227,...
Vibrational temperatures:    114.15   167.55   326.67   340.04  5890.74
                             (Kelvin)  6338.88
Zero-point correction=                0.020866 (Hartree/Particle)
Thermal correction to Energy=         0.026203
Thermal correction to Enthalpy=       0.027147
Thermal correction to Gibbs Free Energy= -0.002526
Sum of electronic and zero-point Energies= -101.641512
Sum of electronic and thermal Energies= -101.636175
Sum of electronic and thermal Enthalpies= -101.635231
Sum of electronic and thermal Free Energies= -101.664904
  1. HF                 1.61  1.18  0.00  1.99    1.79  1.30  0.00  2.21
                        deloc: -0.18 -0.12  0.00  0.22
  2. H2                 0.00  0.08  0.00  0.08    0.01  0.08  0.00  0.09

```

```

0 1
          9          0.000000      0.451609      0.000000
          1          0.746640      0.993348      0.000000
          1         -0.399769     -2.900430     -0.000000
          1         -0.346871     -2.157402     -0.000000
$nb0 file=hh_fh archive nrt plot dipole $end
--Link1--
%mem=2gb
%nprocshared=8
%chk=brh_brh
#b3lyp/6-311++g** opt=calcall polar pop=nbo7read
BrH...BrH, E= -5149.50797736 (dE=-1.02)
FH, E=-100.482383390 (dE= )
ClH, E=-460.834022055 (dE= )
BrH, E=-2574.75317353 (dE= )
HH, E=-1.17957156591 (dE= )
nu: 37,96,173,...
Vibrational temperatures:      53.85   138.23   248.35   372.90   3659.65
(Kelvin)                      3741.29
Zero-point correction=                0.013007 (Hartree/Particle)
Thermal correction to Energy=          0.018521
Thermal correction to Enthalpy=        0.019466
Thermal correction to Gibbs Free Energy= -0.018302
Sum of electronic and zero-point Energies= -5149.494971
Sum of electronic and thermal Energies= -5149.489456
Sum of electronic and thermal Enthalpies= -5149.488512
Sum of electronic and thermal Free Energies= -5149.526279
  1. HBr      -1.13 -0.40  0.00  1.20   -1.24  0.00  0.00  1.24
              deloc:  0.11 -0.40  0.00  0.42
  2. HBr      0.13 -1.20  0.00  1.20    0.13 -1.34  0.00  1.35
0 1
          35          0.018027     -2.102222      0.000000
          1         -1.408607     -2.168100      0.000000
          35          0.018027      2.143678      0.000000
          1          0.146735      0.717134      0.000000
$nb0 file=brh_brh archive nrt plot dipole $end
--Link1--
%mem=2gb
%nprocshared=8
%chk=brh_clh
#b3lyp/6-311++g** opt=calcall polar pop=nbo7read
BrH...ClH, E=-3035.58908266 (dE=-1.18)
FH, E=-100.482383390 (dE= )
ClH, E=-460.834022055 (dE= )
BrH, E=-2574.75317353 (dE= )
HH, E=-1.17957156591 (dE= )
nu: 48,105,167,...
Vibrational temperatures:      68.96   150.84   239.97   391.88   3685.98
(Kelvin)                      4209.92
Zero-point correction=                0.013851 (Hartree/Particle)
Thermal correction to Energy=          0.019319
Thermal correction to Enthalpy=        0.020263
Thermal correction to Gibbs Free Energy= -0.016123
Sum of electronic and zero-point Energies= -3035.575232
Sum of electronic and thermal Energies= -3035.569764
Sum of electronic and thermal Enthalpies= -3035.568820
Sum of electronic and thermal Free Energies= -3035.605205
  1. HCl      -1.44  0.40  0.00  1.50   -1.60  0.13  0.00  1.61
              deloc:  0.16  0.27  0.00  0.31
  2. HBr      0.17  1.19  0.00  1.20    0.18  1.34  0.00  1.35
              deloc: -0.01 -0.16  0.00  0.16
0 1
          17          0.020399      2.724414     -0.000000
          1         -1.259279      2.870995      0.000000
          35          0.020399     -1.405720      0.000000
          1          0.198506      0.014166     -0.000000
$nb0 file=brh_clh archive nrt plot dipole $end
--Link1--
%mem=2gb
%nprocshared=8
%chk=brh_fh

```

```

#b3lyp/6-311++g** opt=calcall polar pop=nbo7read
BrH...FH, E=-2675.23940475 (dE=-2.41)
FH, E=-100.482383390 (dE= )
ClH, E=-460.834022055 (dE= )
BrH, E=-2574.75317353 (dE= )
HH, E=-1.17957156591 (dE= )
nu: 87,135,235,...
Vibrational temperatures: 125.01 194.36 338.82 441.36 3701.25
(Kelvin) 5860.50
Zero-point correction= 0.016881 (Hartree/Particle)
Thermal correction to Energy= 0.022062
Thermal correction to Enthalpy= 0.023007
Thermal correction to Gibbs Free Energy= -0.010771
Sum of electronic and zero-point Energies= -2675.222524
Sum of electronic and thermal Energies= -2675.217342
Sum of electronic and thermal Enthalpies= -2675.216398
Sum of electronic and thermal Free Energies= -2675.250175
1. HF -1.64 1.34 0.00 2.12 -1.81 1.30 0.00 2.23
deloc: 0.17 0.04 0.00 0.17
2. HBr 0.13 1.34 0.00 1.34 0.14 1.50 0.00 1.51
deloc: 0.00 -0.16 0.00 0.16
0 1
9 0.013843 2.729208 -0.000000
1 -0.732269 3.274315 0.000000
35 0.013843 -0.812897 -0.000000
1 0.123170 0.614227 -0.000000
$nb0 file=brh_fh archive nrt plot dipole $end
--Link1--
%mem=2gb
%nprocshared=8
%chk=clh_brh
#b3lyp/6-311++g** opt=calcall polar pop=nbo7read
ClH...BrH, E=-3035.58948228 (dE=-1.44)
FH, E=-100.482383390 (dE= )
ClH, E=-460.834022055 (dE= )
BrH, E=-2574.75317353 (dE= )
HH, E=-1.17957156591 (dE= )
nu: 55,108,207,...
Vibrational temperatures: 79.77 154.75 297.36 425.11 3739.48
(Kelvin) 4097.27
Vibrational temperatures: 79.77 154.75 297.36 425.11 3739.48
(Kelvin) 4097.27
Zero-point correction= 0.013924 (Hartree/Particle)
Thermal correction to Energy= 0.019277
Thermal correction to Enthalpy= 0.020221
Thermal correction to Gibbs Free Energy= -0.015784
Sum of electronic and zero-point Energies= -3035.575558
Sum of electronic and thermal Energies= -3035.570206
Sum of electronic and thermal Enthalpies= -3035.569261
Sum of electronic and thermal Free Energies= -3035.605266
1. HBr 0.47 1.14 0.00 1.24 0.04 1.25 0.00 1.25
deloc: 0.43 -0.11 0.00 0.45
2. HCl 1.50 -0.16 0.00 1.51 1.71 -0.17 0.00 1.71
deloc: -0.20 0.01 0.00 0.20
0 1
35 -1.309859 -0.039403 0.000002
1 -1.396827 1.386314 -0.000016
17 2.696059 0.006404 0.000008
1 1.408902 -0.116073 -0.000211
$nb0 file=clh_brh archive nrt plot dipole $end
--Link1--
%mem=2gb
%nprocshared=8
%chk=clh_clh
#b3lyp/6-311++g** opt=calcall polar pop=nbo7read
ClH...ClH, E=-921.670558460 (dE=-1.58)
FH, E=-100.482383390 (dE= )
ClH, E=-460.834022055 (dE= )
BrH, E=-2574.75317353 (dE= )
HH, E=-1.17957156591 (dE= )
nu: 65,113,199,...

```

```

Vibrational temperatures:   93.22   163.27   286.10   445.42  4129.22
(Kelvin)                   4208.27
Zero-point correction=                0.014766 (Hartree/Particle)
Thermal correction to Energy=          0.020083
Thermal correction to Enthalpy=        0.021027
Thermal correction to Gibbs Free Energy=-0.013646
Sum of electronic and zero-point Energies=-921.655792
Sum of electronic and thermal Energies=-921.650476
Sum of electronic and thermal Enthalpies=-921.649531
Sum of electronic and thermal Free Energies=-921.684204
  1. HCl      -0.45   1.45   0.00   1.52   -0.15   1.61   0.00   1.62
               deloc: -0.30 -0.16   0.00   0.34
  2. HCl      -1.49 -0.26   0.00   1.51   -1.70 -0.28   0.00   1.72
               deloc:  0.21   0.02   0.00   0.21
0 1
      17      -1.904641  -0.070217  -0.000015
      1      -2.057085   1.208964   0.000074
      17      1.983989   0.010337  -0.000021
      1       0.708167  -0.190990   0.000546
$nb0 file=clh_clh archive nrt plot dipole $end
--Link1--
%mem=2gb
%nprocshared=8
%chk=clh_fh
#b3lyp/6-311++g** opt=calcall polar pop=nbo7read
ClH...FH, E=-561.321312583 (dE=-3.08)
FH, E=-100.482383390 (dE= )
ClH, E=-460.834022055 (dE= )
BrH, E=-2574.75317353 (dE= )
HH, E=-1.17957156591 (dE= )
nu: 112,161,292,...
Vibrational temperatures:   160.70   232.10   419.69   523.81  4141.07
(Kelvin)                   5854.40
Zero-point correction=                0.017943 (Hartree/Particle)
Thermal correction to Energy=          0.022888
Thermal correction to Enthalpy=        0.023833
Thermal correction to Gibbs Free Energy=-0.008107
Sum of electronic and zero-point Energies=-561.303370
Sum of electronic and thermal Energies=-561.298424
Sum of electronic and thermal Enthalpies=-561.297480
Sum of electronic and thermal Free Energies=-561.329420
  1. HF      -1.69   1.30   0.00   2.14   -1.86   1.23   0.00   2.23
               deloc:  0.17   0.07   0.00   0.18
  2. HCl      0.17   1.63   0.00   1.64   0.18   1.85   0.00   1.85
               deloc: -0.02 -0.22   0.00   0.22
0 1
      9       0.023339   2.067101  -0.000000
      1      -0.742198   2.585194  -0.000000
      17      0.023339  -1.248692   0.000000
      1       0.135379   0.038657  -0.000000
$nb0 file=clh_fh archive nrt plot dipole $end
--Link1--
%mem=2gb
%nprocshared=8
%chk=fh_brh
#b3lyp/6-311++g** opt=calcall polar pop=nbo7read
FH...BrH, E=-2675.23977260 (dE=-2.65)
FH, E=-100.482383390 (dE= )
ClH, E=-460.834022055 (dE= )
BrH, E=-2574.75317353 (dE= )
HH, E=-1.17957156591 (dE= )
nu: 96,145,337,...
Vibrational temperatures:   138.07   209.26   485.16   642.11  3734.92
(Kelvin)                   5663.42
Zero-point correction=                0.017216 (Hartree/Particle)
Thermal correction to Energy=          0.022085
Thermal correction to Enthalpy=        0.023029
Thermal correction to Gibbs Free Energy=-0.010544
Sum of electronic and zero-point Energies=-2675.222556
Sum of electronic and thermal Energies=-2675.217687
Sum of electronic and thermal Enthalpies=-2675.216743

```

```

Sum of electronic and thermal Free Energies=          -2675.250317
  1. HBr          -0.61  1.18  0.00  1.33   -0.09  1.28  0.00  1.29
                   deloc: -0.52 -0.10  0.00  0.53
  2. HF           -2.06 -0.26  0.00  2.08   -2.29 -0.28  0.00  2.31
                   deloc:  0.23  0.02  0.00  0.23
0 1
      35          -0.718359  -0.039414  -0.000002
      1          -0.763678   1.388916   0.000015
      9          2.682823   0.010399  -0.000017
      1          1.760836  -0.103009   0.000212
$nb0 file=fh_brh archive nrt plot dipole $end
--Link1--
%mem=2gb
%nprocshared=8
%chk=fh_clh
#b3lyp/6-311++g** opt=calcall polar pop=nbo7read
FH...ClH, E=-561.320823712 (dE=-2.77)
FH, E=-100.482383390 (dE= )
ClH, E=-460.834022055 (dE= )
BrH, E=-2574.75317353 (dE= )
HH, E=-1.17957156591 (dE= )
nu: 104,155,344...
Vibrational temperatures:   150.11   223.64   494.92   670.92  4199.60
                           (Kelvin)   5695.20
Zero-point correction=          0.018105 (Hartree/Particle)
Thermal correction to Energy=          0.022916
Thermal correction to Enthalpy=          0.023861
Thermal correction to Gibbs Free Energy=        -0.008327
Sum of electronic and zero-point Energies=        -561.302718
Sum of electronic and thermal Energies=        -561.297907
Sum of electronic and thermal Enthalpies=        -561.296963
Sum of electronic and thermal Free Energies=        -561.329151
  1. HCl          -0.55  1.49  0.00  1.59   -0.14  1.65  0.00  1.65
                   deloc: -0.41 -0.15  0.00  0.43
  2. HF           -2.04 -0.38  0.00  2.08   -2.27 -0.41  0.00  2.31
                   deloc:  0.23  0.04  0.00  0.23
0 1
      17          -1.128882  -0.071457  -0.000003
      1          -1.248200   1.212058   0.000013
      9          2.135246   0.016820  -0.000009
      1          1.221986  -0.148675   0.000114
$nb0 file=fh_clh archive nrt plot dipole $end
--Link1--
%mem=2gb
%nprocshared=8
%chk=fh_fh
#b3lyp/6-311++g** opt=calcall polar pop=nbo7read
FH...FH, E=-200.972811239 (dE=-5.05)
FH, E=-100.482383390 (dE= )
ClH, E=-460.834022055 (dE= )
BrH, E=-2574.75317353 (dE= )
HH, E=-1.17957156591 (dE= )
nu: 161,220,456...
Vibrational temperatures:   232.18   317.65   655.94   829.39  5695.68
                           (Kelvin)   5838.65
Zero-point correction=          0.021486 (Hartree/Particle)
Thermal correction to Energy=          0.025903
Thermal correction to Enthalpy=          0.026848
Thermal correction to Gibbs Free Energy=        -0.002861
Sum of electronic and zero-point Energies=        -200.951325
Sum of electronic and thermal Energies=        -200.946908
Sum of electronic and thermal Enthalpies=        -200.945964
Sum of electronic and thermal Free Energies=        -200.975672
  1. HF           -1.86 -1.13  0.00  2.18   -2.04 -0.96  0.00  2.25
                   deloc:  0.18 -0.17  0.00  0.25
  2. HF           0.31 -2.13  0.00  2.15    0.34 -2.38  0.00  2.40
                   deloc: -0.03  0.25  0.00  0.25
0 1
      9           0.034957  -1.306771  -0.000000
      1          -0.793920  -1.718253  -0.000000
      9           0.034957   1.439904   0.000000

```

```

1 0.164698 0.520062 0.000000
$nb0 file=fh_fh archive nrt plot dipole $end
--Link1--
--Link1--
%mem=2gb
%nprocshared=8
%chk=xh_yh
#b3lyp/6-311++g** opt=calcall polar pop=nbo7read
XH...YH, E= (dE= )
0 1
Y
H 1 1.
X 1 3. 2 110.
H 3 1. 2 30. 1 0.
$nb0 file=xh_yh archive nrt plot dipole $end
--Link1--
--Link1--
%mem=2gb
%nprocshared=8
%chk=xh_yh
#b3lyp/6-311++g** nosymm opt=(maxcycles=100) pop=nbo7del
HH...BrH, E($DEL)=-2575.932652176 (dE=0.06)
0 1
Br
H 1 r1
x 1 1. 2 90.
H 1 r2 2 a1 3 10.
x 4 1. 1 90. 3 180.
H 4 r3 5 a2 1 tw
r1 1.4270
r2 4.3650
r3 0.7443
a1 186.13
a2 -45.89
tw -101.31
$nb0 print=0 $end
$del
delete 2 orbitals 20 21
$end
--Link1--
--Link1--
%mem=2gb
%nprocshared=8
%chk=xh_yh
#b3lyp/6-311++g** nosymm opt=(maxcycles=100) pop=nbo7del
FH...FH, E($DEL)= (dE= )
0 1
F
H 1 r1
x 1 1. 2 90.
F 1 r2 2 a1 3 10.
x 4 1. 1 90. 3 180.
H 4 r3 5 a2 1 tw
r1 1.
r2 3.
r3 1.
a1 120.
a2 90.
tw 20.
$nb0 print=0 $end
$del
delete 2 orbitals 11 12
$end
--Link1--
--Link1--
%mem=2gb
%nprocshared=8
%chk=xh_yh
#b3lyp/6-311++g** nosymm opt=(maxcycles=100) pop=nbo7del
FH...FH, E($DEL)=-200.969569707 (dE=-3.01)
0 1

```



```

F
H 1 r1
x 1 1. 2 90.
F 1 r2 2 a1 3 10.
x 4 1. 1 90. 3 180.
H 4 r3 5 a2 1 tw
r1 0.9239
r2 3.1797
r3 0.9227
a1 129.70
a2 76.36
tw -3.84
$nb0 print=0 $end
$del
delete 2 orbitals 11 12
$end
--Link1--
--Link1--
%mem=2gb
%nprocshared=8
%chk=xh_yh
#b3lyp/6-311++g** nosymm opt=(maxcycles=100) pop=nbo7del
FH...ClH, E($DEL)=-561.319081897 (dE=)
      17      0      0.000000      0.000000      0.000000
      1      0      0.000000      0.000000      1.286382
      9      0      1.950572     -0.343938      2.935405
      1      0      2.791390     -0.334628      2.553954

0 1
Cl
H 1 r1
x 1 1. 2 90.
F 1 r2 2 a1 3 10.
x 4 1. 1 90. 3 180.
H 4 r3 5 a2 1 tw
r1 1.2864
r2 3.5411
r3 0.9233
a1 34.01
a2 189.36
tw 13.53
$nb0 print=0 $end
$del
delete 2 orbitals 15 16
$end
--Link1--
--Link1--
%mem=2gb
%nprocshared=8
%chk=xh_yh
#b3lyp/6-311++g** nosymm opt=(maxcycles=100) pop=nbo7del
FH...BrH, E($DEL)=-2675.237584089 (dE=-1.27)
      35      0.000000      0.000000      0.000000
      1      0.000000      0.000000      1.426300
      9      2.444453     -0.431023      2.691414
      1      2.990902     -0.343013      1.952644

0 1
Br
H 1 r1
x 1 1. 2 90.
F 1 r2 2 a1 3 10.
x 4 1. 1 90. 3 180.
H 4 r3 5 a2 1 tw
r1 1.4263
r2 3.316613
r3 0.9231
a1 42.68
a2 168.06
tw -9.01
$nb0 print=0 $end
$del
delete 2 orbitals 24 25

```

```

$end
--Link1--
--Link1--
%mem=2gb
%nprocshared=8
%chk=xh_yh
#b3lyp/6-311++g** nosymm opt=(maxcycles=100) pop=nbo7del
ClH...FH, E($DEL)=-561.319088228 (dE=-1.68 )
0 1
F
H 1 r1
x 1 1. 2 90.
Cl 1 r2 2 a1 3 10.
x 4 1. 1 90. 3 180.
H 4 r3 5 a2 1 tw
r1 0.9232
r2 3.6872
r3 1.2861
a1 116.69
a2 67.54
tw -9.16
$nbo print=0 $end
$del
delete 2 orbitals 15 16
$end
--Link1--
--Link1--
%mem=2gb
%nprocshared=8
%chk=xh_yh
#b3lyp/6-311++g** nosymm opt=(maxcycles=100) pop=nbo7del
ClH...ClH, E($DEL)=-921.669650599 (dE=-1.01)
0 1
Cl
H 1 r1
x 1 1. 2 90.
Cl 1 r2 2 a1 3 10.
x 4 1. 1 90. 3 180.
H 4 r3 5 a2 1 tw
r1 1.2874
r2 4.0333
r3 1.2871
a1 54.84
a2 143.60
tw -15.53
$nbo print=0 $end
$del
delete 2 orbitals 19 20
$end
--Link1--
--Link1--
%mem=2gb
%nprocshared=8
%chk=xh_yh
#b3lyp/6-311++g** nosymm opt=(maxcycles=100) pop=nbo7del
ClH...BrH, E($DEL)=-3035.587950624 (dE=-0.47)
0 1
Br
H 1 r1
x 1 1. 2 90.
Cl 1 r2 2 a1 3 10.
x 4 1. 1 90. 3 180.
H 4 r3 5 a2 1 tw
r1 1.4272
r2 5.0997
r3 1.2870
a1 101.36
a2 82.63
tw 0.01
$nbo print=0 $end
$del

```

```

    delete 2 orbitals 28 29
$end
--Link1--
--Link1--
%mem=2gb
%nprocshared=8
%chk=xh_yh
#b3lyp/6-311++g** nosymm opt=(maxcycles=100) pop=nbo7del
BrH...FH, E($DEL)=-2675.237558498 (dE=-1.26)
0 1
F
H 1 r1
x 1 1. 2 90.
Br 1 r2 2 a1 3 10.
x 4 1. 1 90. 3 180.
H 4 r3 5 a2 1 tw
r1 0.9230
r2 3.9294
r3 1.4261
a1 117.52
a2 67.26
tw -9.03
$nbo print=0 $end
$del
    delete 2 orbitals 24 25
$end
--Link1--
--Link1--
%mem=2gb
%nprocshared=8
%chk=xh_yh
#b3lyp/6-311++g** nosymm opt=(maxcycles=100) pop=nbo7del
BrH...ClH, E($DEL)=-3035.588046795 (dE=-0.53)
0 1
Cl
H 1 r1
x 1 1. 2 90.
Br 1 r2 2 a1 3 10.
x 4 1. 1 90. 3 180.
H 4 r3 5 a2 1 tw
r1 1.2870
r2 4.8190
r3 1.4265
a1 96.41
a2 77.05
tw -13.65
$nbo print=0 $end
$del
    delete 2 orbitals 28 29
$end
--Link1--
--Link1--
%mem=2gb
%nprocshared=8
%chk=xh_yh
#b3lyp/6-311++g** nosymm opt=(maxcycles=100) pop=nbo7del
BrH...BrH, E($DEL)=-5149.506516181* (dE=-0.11)
0 1
Br
H 1 r1
x 1 1. 2 90.
Br 1 r2 2 a1 3 10.
x 4 1. 1 90. 3 180.
H 4 r3 5 a2 1 tw
r1 1.4261
r2 4.6019
r3 1.4292
a1 221.98
a2 42.66
tw 2.67
$nbo print=0 $end

```

```

$del
  delete 2 orbitals 37 38
$end
--Link1--
--Link1--
%mem=2gb
%nprocshared=8
%chk=xh_yh
#b3lyp/6-311++g** nosymm opt=(maxcycles=100) pop=nbo7del
HH...FH, E($DEL)=-101.662438626 (dE=-0.30)
0 1
F
H 1 r1
x 1 1. 2 90.
H 1 r2 2 a1 3 10.
x 4 1. 1 90. 3 180.
H 4 r3 5 a2 1 tw
r1 0.9222
r2 3.4401
r3 0.7451
a1 5.65
a2 352.25
tw -213.18
$nbo print=0 $end
$del
  delete 2 orbitals 7 8
$end
--Link1--
--Link1--
%mem=2gb
%nprocshared=8
%chk=xh_yh
#b3lyp/6-311++g** nosymm opt=(maxcycles=100) pop=nbo7del
HH...ClH, E($DEL)=-462.013682447 (dE=-0.06)
0 1
Cl
H 1 r1
x 1 1. 2 90.
H 1 r2 2 a1 3 10.
x 4 1. 1 90. 3 180.
H 4 r3 5 a2 1 tw
r1 1.2876
r2 5.3140
r3 0.7429
a1 12.66
a2 42.14
tw 103.34
$nbo print=0 $end
$del
  delete 2 orbitals 11 12
$end
--Link1--
--Link1--

```

## ROTATION BARRIERS

```

----
HOOH
----
full: -151.6021697 @ 121.12
DEL: -151.5777827 @ 130.44
%-Del-E = 0.016%
-----
CH3CH3
-----
full: -79.8565753 @ 60.12
DEL: -79.8179280 @ 63.26
%-Del-E = 0.048%
-----
CH3NH2
-----

```

```
full: -95.8938910
DEL: -95.8466542
%-Del-E = 0.049%
```

```
-----
HCONH2
-----
```

```
full: -169.954848506
DEL: -169.769538009
%-Del-E = 0.684%
```

```
-----
%mem=2gb
%nprocshared=8
%chk=rot_barr
#b3lyp/6-311++g** pop=nbo7del nosymm opt=z-matrix
HCONH2 (tau=0), E(DEL)=-169.767055457 (1.56)
0 1
```

```
H
C 1 r2
O 2 r3 1 a3
N 2 r4 1 a4 3 d4
H 4 r5 2 a5 3 tau
H 4 r6 2 a6 3 d6
```

```
r2 1.0500
r3 1.2982
a3 116.52
r4 1.5477
a4 130.02
d4 178.47
r5 1.0094
a5 105.48
r6 1.0096
a6 107.92
d6 246.08
```

```
tau 0.
```

```
$nbo print=0 $end
```

```
$DEL
```

```
Lewis
```

```
$END
```

```
--Link1--
```

```
%mem=2gb
```

```
%nprocshared=8
```

```
%chk=rot_barr
```

```
#b3lyp/6-311++g** pop=nbo7del nosymm opt=z-matrix
HCONH2 (tau=10), E(DEL)=-169.767655109 (1.18)
```

```
0 1
```

```
H
```

```
C 1 r2
O 2 r3 1 a3
N 2 r4 1 a4 3 d4
H 4 r5 2 a5 3 tau
H 4 r6 2 a6 3 d6
```

```
r2 1.0496
r3 1.2994
a3 116.64
r4 1.5469
a4 129.72
d4 177.93
r5 1.0105
a5 105.37
r6 1.0108
a6 107.67
d6 256.39
```

```
tau 10.
```

```
$nbo print=0 $end
```

```
$DEL
```

```
Lewis
```

```
$END
```

```
--Link1--
```

```
%mem=2gb
```

```
%nprocshared=8
```

```
%chk=rot_barr
```

```

#b3lyp/6-311++g** pop=nbo7del nosymm opt=z-matrix
HCONH2 (tau=20), E(DEL)=-169.768249692 (0.81)
0 1
H
C 1 r2
O 2 r3 1 a3
N 2 r4 1 a4 3 d4
H 4 r5 2 a5 3 tau
H 4 r6 2 a6 3 d6
r2 1.0490
r3 1.3007
a3 116.96
r4 1.5452
a4 129.18
d4 177.62
r5 1.0112
a5 105.37
r6 1.0116
a6 107.42
d6 266.61
tau 20.
$nb0 print=0 $end
$DEL
Lewis
$END
--Link1--
%mem=2gb
%nprocshared=8
%chk=rot_barr
#b3lyp/6-311++g** pop=nbo7del nosymm opt=z-matrix
HCONH2 (tau=30), E(DEL)= -169.768798741 (0.46)
0 1
H
C 1 r2
O 2 r3 1 a3
N 2 r4 1 a4 3 d4
H 4 r5 2 a5 3 tau
H 4 r6 2 a6 3 d6
r2 1.0486
r3 1.3019
a3 117.17
r4 1.5437
a4 128.80
d4 177.72
r5 1.0122
a5 105.40
r6 1.0126
a6 107.02
d6 277.02
tau 30.
$nb0 print=0 $end
$DEL
Lewis
$END
--Link1--
%mem=2gb
%nprocshared=8
%chk=rot_barr
#b3lyp/6-311++g** pop=nbo7del nosymm opt=z-matrix
HCONH2 (tau=40), E(DEL)=-169.769234708 (0.19)
0 1
H
C 1 r2
O 2 r3 1 a3
N 2 r4 1 a4 3 d4
H 4 r5 2 a5 3 tau
H 4 r6 2 a6 3 d6
r2 1.0482
r3 1.3029
a3 117.34
r4 1.5421

```

```

a4  128.50
d4  178.25
r5  1.0129
a5  105.58
r6  1.0131
a6  106.65
d6  287.20
tau 40.
$nb0 print=0 $end
$DEL
  Lewis
$END
--Link1--
%mem=2gb
%nprocshared=8
%chk=rot_barr
#b3lyp/6-311++g** pop=nbo7del nosymm opt=z-matrix
HCONH2 (tau=50), E(DEL)=-169.769489864 (0.03)
0 1
H
C   1  r2
O   2  r3   1  a3
N   2  r4   1  a4   3  d4
H   4  r5   2  a5   3  tau
H   4  r6   2  a6   3  d6
r2   1.0479
r3   1.3036
a3   117.49
r4   1.5415
a4   128.38
d4   179.32
r5   1.0130
a5   105.84
r6   1.0131
a6   106.28
d6   297.14
tau 50.
$nb0 print=0 $end
$DEL
  Lewis
$END
--Link1--
%mem=2gb
%nprocshared=8
%chk=rot_barr
#b3lyp/6-311++g** pop=nbo7del nosymm opt=z-matrix
HCONH2 (tau=60), E(DEL)=-169.769525017 (0.01)
0 1
H
C   1  r2
O   2  r3   1  a3
N   2  r4   1  a4   3  d4
H   4  r5   2  a5   3  tau
H   4  r6   2  a6   3  d6
r2   1.0479
r3   1.3037
a3   117.53
r4   1.5403
a4   128.22
d4   180.46
r5   1.0130
a5   106.32
r6   1.0130
a6   106.08
d6   306.78
tau 60.
$nb0 print=0 $end
$DEL
  Lewis
$END
--Link1--

```

```

%mem=2gb
%nprocshared=8
%chk=rot_barr
#b3lyp/6-311++g** pop=nbo7del nosymm opt=z-matrix
HCONH2 (tau=70), E(DEL)=-169.768978994 (0.35)
0 1
H
C 1 r2
O 2 r3 1 a3
N 2 r4 1 a4 3 d4
H 4 r5 2 a5 3 tau
H 4 r6 2 a6 3 d6
r2 1.0484
r3 1.3022
a3 117.29
r4 1.5419
a4 128.54
d4 182.22
r5 1.0117
a5 107.32
r6 1.0115
a6 105.88
d6 325.47
tau 70.
$nb0 print=0 $end
$DEL
Lewis
$END
--Link1--
%mem=2gb
%nprocshared=8
%chk=rot_barr
#b3lyp/6-311++g** pop=nbo7del nosymm opt=z-matrix
HCONH2 (tau=80), E(DEL)=-169.768978994 (0.35)
0 1
H
C 1 r2
O 2 r3 1 a3
N 2 r4 1 a4 3 d4
H 4 r5 2 a5 3 tau
H 4 r6 2 a6 3 d6
r2 1.0484
r3 1.3022
a3 117.29
r4 1.5419
a4 128.54
d4 182.22
r5 1.0117
a5 107.32
r6 1.0115
a6 105.88
d6 325.47
tau 80.
$nb0 print=0 $end
$DEL
Lewis
$END
--Link1--
%mem=2gb
%nprocshared=8
%chk=rot_barr
#b3lyp/6-311++g** pop=nbo7del nosymm opt=z-matrix
HCONH2 (tau=90), E(DEL)=-169.768490053 (0.66)
0 1
H
C 1 r2
O 2 r3 1 a3
N 2 r4 1 a4 3 d4
H 4 r5 2 a5 3 tau
H 4 r6 2 a6 3 d6
r2 1.0488

```



```

r3  1.3011
a3  117.08
r4  1.5431
a4  128.86
d4  182.46
r5  1.0106
a5  107.80
r6  1.0104
a6  105.91
d6  334.74
tau 90.
$nb0 print=0 $end
$DEL
  Lewis
$END
--Link1--
%mem=2gb
%nprocshared=8
%chk=rot_barr
#b3lyp/6-311++g** pop=nbo7del nosymm opt=z-matrix
HCONH2 (tau=100), E(DEL)=-169.767931662 (1.01)
0 1
H
C   1  r2
O   2  r3   1  a3
N   2  r4   1  a4   3  d4
H   4  r5   2  a5   3  tau
H   4  r6   2  a6   3  d6
r2  1.0493
r3  1.2998
a3  116.88
r4  1.5445
a4  129.24
d4  182.44
r5  1.0097
a5  108.14
r6  1.0096
a6  105.94
d6  344.33
tau 100.
$nb0 print=0 $end
$DEL
  Lewis
$END
--Link1--
%mem=2gb
%nprocshared=8
%chk=rot_barr
#b3lyp/6-311++g** pop=nbo7del nosymm opt=z-matrix
HCONH2 (tau=110), E(DEL)=-169.767349406 (1.37)
0 1
H
C   1  r2
O   2  r3   1  a3
N   2  r4   1  a4   3  d4
H   4  r5   2  a5   3  tau
H   4  r6   2  a6   3  d6
r2  1.0498
r3  1.2986
a3  116.69
r4  1.5453
a4  129.68
d4  182.03
r5  1.0085
a5  108.48
r6  1.0085
a6  106.04
d6  353.82
tau 110.
$nb0 print=0 $end
$DEL

```

```

Lewis
$END
--Link1--
%mem=2gb
%nprocshared=8
%chk=rot_barr
#b3lyp/6-311++g** pop=nbo7del nosymm opt=z-matrix
HCONH2 (tau=120), E(DEL)=-169.766761745 (1.74)
0 1
H
C 1 r2
O 2 r3 1 a3
N 2 r4 1 a4 3 d4
H 4 r5 2 a5 3 tau
H 4 r6 2 a6 3 d6
r2 1.0503
r3 1.2975
a3 116.50
r4 1.5461
a4 130.16
d4 181.34
r5 1.0076
a5 108.65
r6 1.0078
a6 106.04
d6 363.70
tau 120.
$nbo print=0 $end
$DEL
Lewis
$END
--Link1--
%mem=2gb
%nprocshared=8
%chk=rot_barr
#b3lyp/6-311++g** pop=nbo7del nosymm opt=z-matrix
HCONH2 (tau=130), E(DEL)=-169.761210536 (5.22)
0 1
H
C 1 r2
O 2 r3 1 a3
N 2 r4 1 a4 3 d4
H 4 r5 2 a5 3 tau
H 4 r6 2 a6 3 d6
r2 1.0481
r3 1.3020
a3 117.19
r4 1.5345
a4 125.52
d4 181.91
r5 1.0080
a5 109.77
r6 1.0081
a6 109.40
d6 250.60
tau 130.
$nbo print=0 $end
$DEL
Lewis
$END
--Link1--
%mem=2gb
%nprocshared=8
%chk=rot_barr
#b3lyp/6-311++g** pop=nbo7del nosymm opt=z-matrix
HCONH2 (tau=140), E(DEL)=-169.761016586 (5.35)
0 1
H
C 1 r2
O 2 r3 1 a3
N 2 r4 1 a4 3 d4

```

```

H 4 r5 2 a5 3 tau
H 4 r6 2 a6 3 d6
r2 1.0484
r3 1.3015
a3 117.09
r4 1.5358
a4 125.77
d4 183.53
r5 1.0079
a5 109.80
r6 1.0080
a6 109.14
d6 260.26
tau 140.
$nb0 print=0 $end
$DEL
Lewis
$END
--Link1--
%mem=2gb
%nprocshared=8
%chk=rot_barr
#b3lyp/6-311++g** pop=nbo7del nosymm opt=z-matrix
HCONH2 (tau=150), E(DEL)=-169.760840721 (5.46)
0 1
H
C 1 r2
O 2 r3 1 a3
N 2 r4 1 a4 3 d4
H 4 r5 2 a5 3 tau
H 4 r6 2 a6 3 d6
r2 1.0488
r3 1.3008
a3 116.92
r4 1.5374
a4 126.26
d4 184.33
r5 1.0074
a5 109.86
r6 1.0075
a6 109.00
d6 270.28
tau 150.
$nb0 print=0 $end
$DEL
Lewis
$END
--Link1--
%mem=2gb
%nprocshared=8
%chk=rot_barr
#b3lyp/6-311++g** pop=nbo7del nosymm opt=z-matrix
HCONH2 (tau=160), E(DEL)=-169.760844945 (5.46)
0 1
H
C 1 r2
O 2 r3 1 a3
N 2 r4 1 a4 3 d4
H 4 r5 2 a5 3 tau
H 4 r6 2 a6 3 d6
r2 1.0493
r3 1.3000
a3 116.61
r4 1.5385
a4 127.02
d4 184.87
r5 1.0067
a5 109.94
r6 1.0067
a6 108.88
d6 280.53

```

```

tau 160.
$nb0 print=0 $end
$DEL
  Lewis
$END
--Link1--
%mem=2gb
%nprocshared=8
%chk=rot_barr
#b3lyp/6-311++g** pop=nbo7del nosymm opt=z-matrix
HCONH2 (tau=170), E(DEL)=-169.761156673 (5.26)
0 1
H
C 1 r2
O 2 r3 1 a3
N 2 r4 1 a4 3 d4
H 4 r5 2 a5 3 tau
H 4 r6 2 a6 3 d6
r2 1.0498
r3 1.2988
a3 116.50
r4 1.5394
a4 127.77
d4 184.84
r5 1.0057
a5 110.03
r6 1.0057
a6 108.73
d6 290.88
tau 170.
$nb0 print=0 $end
$DEL
  Lewis
$END
--Link1--
%mem=2gb
%nprocshared=8
%chk=rot_barr
#b3lyp/6-311++g** pop=nbo7del nosymm opt=z-matrix
HCONH2 (tau=180), E(DEL)=-169.761773208 (4.87)
0 1
H
C 1 r2
O 2 r3 1 a3
N 2 r4 1 a4 3 d4
H 4 r5 2 a5 3 tau
H 4 r6 2 a6 3 d6
r2 1.0505
r3 1.2969
a3 116.42
r4 1.5400
a4 128.50
d4 184.19
r5 1.0048
a5 109.84
r6 1.0056
a6 108.56
d6 300.53
tau 180.
$nb0 print=0 $end
$DEL
  Lewis
$END
--Link1--
--Link1--
%mem=2gb
%nprocshared=8
%chk=rot_barr
#b3lyp/6-311++g** pop=nbo7read nosymm opt=z-matrix freq
cis-CHFCHF, E(full)=-277.142846266
nu:237,510,771,...

```

|                           |         |         |         |         |         |
|---------------------------|---------|---------|---------|---------|---------|
| Vibrational temperatures: | 340.39  | 733.61  | 1108.85 | 1116.07 | 1251.17 |
| (Kelvin)                  | 1452.66 | 1617.65 | 1842.14 | 1988.01 | 2526.05 |
|                           | 4625.18 | 4658.01 |         |         |         |

|                                              |                             |
|----------------------------------------------|-----------------------------|
| Zero-point correction=                       | 0.036830 (Hartree/Particle) |
| Thermal correction to Energy=                | 0.040698                    |
| Thermal correction to Enthalpy=              | 0.041642                    |
| Thermal correction to Gibbs Free Energy=     | 0.010510                    |
| Sum of electronic and zero-point Energies=   | -277.106017                 |
| Sum of electronic and thermal Energies=      | -277.102148                 |
| Sum of electronic and thermal Enthalpies=    | -277.101204                 |
| Sum of electronic and thermal Free Energies= | -277.132336                 |

0 1

H

```

C 1 r2
C 2 r3 1 a3
F 2 r4 3 a4 1 d4
H 3 r5 2 a5 1 d5
F 3 r6 2 a6 4 d6

```

```

r2 1.0811
r3 1.3238
a3 122.98
r4 1.3432
a4 122.59
d4 180.00
r5 1.0811
a5 122.99
d5 0.00
r6 1.3432
a6 122.59
d6 0.

```

\$nbo file=cis\_chfchf \$end

--Link1--

--Link1--

%mem=2gb

%nprocshared=8

%chk=rot\_barr

#b3lyp/6-311++g\*\* pop=nbo7del nosymm opt=z-matrix freq

cis-CHFCHF, E(DEL)=-276.972503939

nu:317,334,551,...

|                           |         |         |         |         |         |
|---------------------------|---------|---------|---------|---------|---------|
| Vibrational temperatures: | 456.74  | 480.82  | 793.04  | 1186.31 | 1301.63 |
| (Kelvin)                  | 1628.46 | 1652.72 | 1851.36 | 1874.84 | 2505.74 |
|                           | 4634.46 | 4644.87 |         |         |         |

|                                              |                             |
|----------------------------------------------|-----------------------------|
| Zero-point correction=                       | 0.036436 (Hartree/Particle) |
| Thermal correction to Energy=                | 0.040427                    |
| Thermal correction to Enthalpy=              | 0.041371                    |
| Thermal correction to Gibbs Free Energy=     | 0.010285                    |
| Sum of electronic and zero-point Energies=   | -277.105129                 |
| Sum of electronic and thermal Energies=      | -277.101138                 |
| Sum of electronic and thermal Enthalpies=    | -277.100193                 |
| Sum of electronic and thermal Free Energies= | -277.131279                 |

0 1

H

```

C 1 r2
C 2 r3 1 a3
F 2 r4 3 a4 1 d4
H 3 r5 2 a5 1 d5
F 3 r6 2 a6 4 d6

```

```

r2 1.0601
r3 1.3520
a3 133.70
r4 1.4945
a4 115.34
d4 179.97
r5 1.0601
a5 133.70
d5 0.01
r6 1.4946
a6 115.35
d6 -0.02

```

\$nbo print=0 \$end

\$del

```

lewis
$end
--Link1--
--Link1--
%mem=2gb
%nprocshared=8
%chk=rot_barr
#b3lyp/6-311++g** pop=nbo7read nosymm opt=z-matrix freq
trans=CHFCHF, E(full)=-277.141564470
nu:317,334,551,...
Vibrational temperatures:   456.74   480.82   793.04  1186.31  1301.63
                             (Kelvin)  1628.46  1652.72  1851.36  1874.84  2505.74
                             4634.46  4644.87

Zero-point correction=      0.036436 (Hartree/Particle)
Thermal correction to Energy=      0.040427
Thermal correction to Enthalpy=      0.041371
Thermal correction to Gibbs Free Energy=      0.010285
Sum of electronic and zero-point Energies=      -277.105129
Sum of electronic and thermal Energies=      -277.101138
Sum of electronic and thermal Enthalpies=      -277.100193
Sum of electronic and thermal Free Energies=      -277.131279
0 1
H
C   1   r2
C   2   r3   1   a3
F   2   r4   3   a4   1   d4
H   3   r5   2   a5   1   d5
F   3   r6   2   a6   4   d6
r2  1.0814
r3  1.3222
a3  125.71
r4  1.3500
a4  120.03
d4  180.00
r5  1.0814
a5  125.71
d5  180.00
r6  1.3500
a6  120.03
d6  180.00
$nbo file=cis_chfchf $end
--Link1--
--Link1--
%mem=2gb
%nprocshared=8
%chk=rot_barr
#b3lyp/6-311++g** pop=nbo7del nosymm freq
trans=CHFCHF, E(DEL)=-276.979176905
nu: 298,332,478,...
Vibrational temperatures:   429.09   477.08   688.24  1257.74  1268.76
                             (Kelvin)  1506.44  1527.42  1714.19  1776.49  2831.66
                             5012.92  5106.04

Zero-point correction=      0.037362 (Hartree/Particle)
Thermal correction to Energy=      0.041449
Thermal correction to Enthalpy=      0.042394
Thermal correction to Gibbs Free Energy=      0.010983
Sum of electronic and zero-point Energies=      -276.941815
Sum of electronic and thermal Energies=      -276.937727
Sum of electronic and thermal Enthalpies=      -276.936783
Sum of electronic and thermal Free Energies=      -276.968194
0 1
H
C   1   r2
C   2   r3   1   a3
F   2   r4   3   a4   1   d4
H   3   r5   2   a5   1   d5
F   3   r6   2   a6   4   d6
r2  1.0621
r3  1.3493
a3  133.44
r4  1.4935

```

```

a4 114.04
d4 179.96
r5 1.0621
a5 133.44
d5 180.06
r6 1.4935
a6 114.01
d6 180.01
$nb0 print=0 $end
$del
    lewis
$end
--Link1--
--Link1--
%mem=2gb
%nprocshared=8
%chk=rot_barr
#b3lyp/6-311++g** pop=nbo7read nosymm opt=z-matrix freq
HOOH, E(full)=-151.602169726
nu:365,934,1296,...
Vibrational temperatures:    525.24 1344.14 1865.30 2090.70 5434.06
                             (Kelvin) 5435.42
Zero-point correction=      0.026435 (Hartree/Particle)
Thermal correction to Energy=      0.029677
Thermal correction to Enthalpy=      0.030621
Thermal correction to Gibbs Free Energy=      0.004121
Sum of electronic and zero-point Energies=      -151.575735
Sum of electronic and thermal Energies=      -151.572493
Sum of electronic and thermal Enthalpies=      -151.571549
Sum of electronic and thermal Free Energies=      -151.598049
0 1
H
O 1 r2
O 2 r3 1 a3
H 3 r4 2 a4 1 tw
r2 0.9672
r3 1.4540
a3 100.47
r4 0.9672
a4 100.47
tw 121.12
$nb0 file=HOOH $end
--Link1--
--Link1--
%mem=2gb
%nprocshared=8
%chk=rot_barr
#b3lyp/6-311++g** pop=nbo7del nosymm freq
HOOH, E(DEL)=-151.577782680
nu: 196,930,1461,...
Vibrational temperatures:    281.53 1337.88 2101.83 2326.79 5368.40
                             (Kelvin) 5422.73
Zero-point correction=      0.026663 (Hartree/Particle)
Thermal correction to Energy=      0.030120
Thermal correction to Enthalpy=      0.031064
Thermal correction to Gibbs Free Energy=      0.004630
Sum of electronic and zero-point Energies=      -151.551119
Sum of electronic and thermal Energies=      -151.547662
Sum of electronic and thermal Enthalpies=      -151.546718
Sum of electronic and thermal Free Energies=      -151.573153
0 1
H
O 1 r2
O 2 r3 1 a3
H 3 r4 2 a4 1 tw
r2 0.9720
r3 1.5196
a3 95.41
r4 0.9720
a4 95.41
tw 130.44

```

```

$nb0 print=0 $end
$DEL
  Lewis
$END
--Link1--
--Link1--
%mem=2gb
%nprocshared=8
%chk=rot_barr
#b3lyp/6-311++g** pop=nb07read nosymm opt=modredundant
HOOH rotation barrier
Summary of Optimized Potential Surface Scan (add -151.0 to energies):

```

|                         | 1                | 2                | 3                | 4          |
|-------------------------|------------------|------------------|------------------|------------|
| 5                       |                  |                  |                  |            |
| Eigenvalues --          | -0.588669 (8.47) | -0.588981 (8.28) | -0.589869 (7.72) | -0.591216  |
| (6.87) -0.592872 (5.83) |                  |                  |                  |            |
| R1                      | 0.967354         | 0.967452         | 0.967627         | 0.967904   |
| 0.968229                |                  |                  |                  |            |
| R2                      | 1.462041         | 1.462287         | 1.460884         | 1.458740   |
| 1.456203                |                  |                  |                  |            |
| R3                      | 0.967353         | 0.967452         | 0.967627         | 0.967904   |
| 0.968230                |                  |                  |                  |            |
| A1                      | 105.323500       | 105.216869       | 104.988747       | 104.649150 |
| 104.236775              |                  |                  |                  |            |
| A2                      | 105.323472       | 105.216774       | 104.989227       | 104.648880 |
| 104.237009              |                  |                  |                  |            |
| D1                      | 0.000000         | 10.000000        | 20.000000        | 30.000000  |
| 40.000000               |                  |                  |                  |            |
| 6                       |                  |                  |                  |            |
| 10                      |                  |                  |                  |            |
| Eigenvalues --          | -0.594679 (4.70) | -0.596480 (3.57) | -0.598145 (2.53) | -0.599577  |
| (1.63) -0.600718 (0.91) |                  |                  |                  |            |
| R1                      | 0.968535         | 0.968753         | 0.968830         | 0.968739   |
| 0.968481                |                  |                  |                  |            |
| R2                      | 1.453641         | 1.451409         | 1.449799         | 1.449008   |
| 1.449113                |                  |                  |                  |            |
| R3                      | 0.968535         | 0.968752         | 0.968830         | 0.968738   |
| 0.968481                |                  |                  |                  |            |
| A1                      | 103.785411       | 103.318931       | 102.848653       | 102.373679 |
| 101.889558              |                  |                  |                  |            |
| A2                      | 103.785464       | 103.318761       | 102.848824       | 102.373432 |
| 101.889686              |                  |                  |                  |            |
| D1                      | 50.000000        | 60.000000        | 70.000000        | 80.000000  |
| 90.000000               |                  |                  |                  |            |
| 11                      |                  |                  |                  |            |
| 15                      |                  |                  |                  |            |
| Eigenvalues --          | -0.601531 (0.40) | -0.602005 (0.10) | -0.602168 (0.00) | -0.602089  |
| (0.05) -0.601855 (0.20) |                  |                  |                  |            |
| R1                      | 0.968097         | 0.967661         | 0.967240         | 0.966879   |
| 0.966598                |                  |                  |                  |            |
| R2                      | 1.450065         | 1.451713         | 1.453826         | 1.456149   |
| 1.458426                |                  |                  |                  |            |
| R3                      | 0.968097         | 0.967661         | 0.967240         | 0.966879   |
| 0.966598                |                  |                  |                  |            |
| A1                      | 101.406120       | 100.941009       | 100.509068       | 100.119859 |
| 99.783429               |                  |                  |                  |            |
| A2                      | 101.406047       | 100.941142       | 100.509274       | 100.119977 |
| 99.783802               |                  |                  |                  |            |
| D1                      | 100.000000       | 110.000000       | 120.000000       | 130.000000 |
| 140.000000              |                  |                  |                  |            |
| 16                      |                  |                  |                  |            |
| Eigenvalues --          | -0.601555 (0.39) | -0.601268 (0.57) | -0.601063 (0.69) | -0.600988  |
| (0.74)                  |                  |                  |                  |            |
| R1                      | 0.966402         | 0.966281         | 0.966221         | 0.966223   |
| R2                      | 1.460439         | 1.462008         | 1.463008         | 1.463002   |
| R3                      | 0.966402         | 0.966281         | 0.966221         | 0.966223   |
| A1                      | 99.510911        | 99.311488        | 99.191589        | 99.192705  |
| A2                      | 99.510817        | 99.311853        | 99.191450        | 99.192640  |
| D1                      | 150.000000       | 160.000000       | 170.000000       | 180.000000 |
| 0 1                     |                  |                  |                  |            |
| H                       |                  |                  |                  |            |



```

O 1 r2
O 2 r3 1 a3
H 3 r4 2 a4 1 tw
r2 0.9720
r3 1.5196
a3 95.41
r4 0.9720
a4 95.41
tw 0.
1 2 3 4 S 18 10.
$nb0 print=0 $end
--Link1--
--Link1--
%mem=2gb
%nprocshared=8
%chk=rot_barr
#b3lyp/6-311++g** pop=nbo7del nosymm opt=z-matrix
HOOH, E(DEL; tau=0)=-151.561164017(NNYY) (10.43)
0 1
H
O 1 r2
O 2 r3 1 a3
H 3 r4 2 a4 1 tw
r2 0.9749
r3 1.5312
a3 99.94
r4 0.9749
a4 99.94
tw 0.
$nb0 print=0 $end
$DEL
Lewis
$END
--Link1--
%mem=2gb
%nprocshared=8
%chk=rot_barr
#b3lyp/6-311++g** pop=nbo7del nosymm opt=z-matrix
HOOH, E(DEL; tau=10)=-151.561484852(YYYY) (10.23)
0 1
H
O 1 r2
O 2 r3 1 a3
H 3 r4 2 a4 1 tw
r2 0.9762
r3 1.5294
a3 99.85
r4 0.9762
a4 99.85
tw 10.
$nb0 print=0 $end
$DEL
Lewis
$END
--Link1--
%mem=2gb
%nprocshared=8
%chk=rot_barr
#b3lyp/6-311++g** pop=nbo7del nosymm opt=z-matrix
HOOH, E(DEL; tau=20)=-151.562428514(NNYY) (9.63)
0 1
H
O 1 r2
O 2 r3 1 a3
H 3 r4 2 a4 1 tw
r2 0.9767
r3 1.5269
a3 99.79
r4 0.9767
a4 99.82
tw 20.

```

```

$nb0 print=0 $end
$DEL
  Lewis
$END
--Link1--
%mem=2gb
%nprocshared=8
%chk=rot_barr
#b3lyp/6-311++g** pop=nbo7del nosymm opt=z-matrix
HOOH, E(DEL; tau=30)=-151.563970462(YYYY) (8.67)
0 1
H
O 1 r2
O 2 r3 1 a3
H 3 r4 2 a4 1 tw
r2 0.9739
r3 1.5272
a3 98.91
r4 0.9739
a4 98.91
tw 30.
$nb0 print=0 $end
$DEL
  Lewis
$END
--Link1--
%mem=2gb
%nprocshared=8
%chk=rot_barr
#b3lyp/6-311++g** pop=nbo7del nosymm opt=z-matrix
HOOH, E(DEL; tau=40)=-151.565871693(YYYY) (7.47)
0 1
H
O 1 r2
O 2 r3 1 a3
H 3 r4 2 a4 1 tw
r2 0.9739
r3 1.5254
a3 98.31
r4 0.9739
a4 98.31
tw 40.
$nb0 print=0 $end
$DEL
  Lewis
$END
--Link1--
%mem=2gb
%nprocshared=8
%chk=rot_barr
#b3lyp/6-311++g** pop=nbo7del nosymm opt=z-matrix
HOOH, E(DEL; tau=50)=-151.567965276 (6.16)
0 1
H
O 1 r2
O 2 r3 1 a3
H 3 r4 2 a4 1 tw
r2 0.9739
r3 1.5236
a3 97.69
r4 0.9739
a4 97.69
tw 50.
$nb0 print=0 $end
$DEL
  Lewis
$END
--Link1--
%mem=2gb
%nprocshared=8
%chk=rot_barr

```

```

#b3lyp/6-311++g** pop=nbo7del nosymm opt=z-matrix
HOOH, E(DEL; tau=60)=-151.570068697 (4.84)
0 1
H
O 1 r2
O 2 r3 1 a3
H 3 r4 2 a4 1 tw
r2 0.9741
r3 1.5229
a3 97.08
r4 0.9741
a4 97.08
tw 60.
$nb0 print=0 $end
$DEL
Lewis
$END
--Link1--
%mem=2gb
%nprocshared=8
%chk=rot_barr
#b3lyp/6-311++g** pop=nbo7del nosymm opt=z-matrix
HOOH, E(DEL; tau=70)=-151.572041240 (3.60)
0 1
H
O 1 r2
O 2 r3 1 a3
H 3 r4 2 a4 1 tw
r2 0.9740
r3 1.5212
a3 96.60
r4 0.9740
a4 96.60
tw 70.
$nb0 print=0 $end
$DEL
Lewis
$END
--Link1--
%mem=2gb
%nprocshared=8
%chk=rot_barr
#b3lyp/6-311++g** pop=nbo7del nosymm opt=z-matrix
HOOH, E(DEL; tau=80)=-151.573787126 (2.51)
0 1
H
O 1 r2
O 2 r3 1 a3
H 3 r4 2 a4 1 tw
r2 0.9739
r3 1.5200
a3 96.21
r4 0.9739
a4 96.21
tw 80.
$nb0 print=0 $end
$DEL
Lewis
$END
--Link1--
%mem=2gb
%nprocshared=8
%chk=rot_barr
#b3lyp/6-311++g** pop=nbo7del nosymm opt=z-matrix
HOOH, E(DEL; tau=90)=-151.575261231 (1.58)
0 1
H
O 1 r2
O 2 r3 1 a3
H 3 r4 2 a4 1 tw
r2 0.9736

```

```

r3  1.5192
a3  95.92
r4  0.9736
a4  95.92
tw  90.
$nb0 print=0 $end
$DEL
  Lewis
$END
--Link1--
%mem=2gb
%nprocshared=8
%chk=rot_barr
#b3lyp/6-311++g** pop=nbo7del nosymm opt=z-matrix
HOOH, E(DEL; tau=100)= -151.576397011 (0.87)
0 1
H
O  1  r2
O  2  r3  1  a3
H  3  r4  2  a4  1  tw
r2  0.9733
r3  1.5195
a3  95.69
r4  0.9733
a4  95.69
tw  100.
$nb0 print=0 $end
$DEL
  Lewis
$END
--Link1--
%mem=2gb
%nprocshared=8
%chk=rot_barr
#b3lyp/6-311++g** pop=nbo7del nosymm opt=z-matrix
HOOH, E(DEL; tau=110)=-151.577189565 (0.37)
0 1
H
O  1  r2
O  2  r3  1  a3
H  3  r4  2  a4  1  tw
r2  0.9728
r3  1.5190
a3  95.52
r4  0.9728
a4  95.52
tw  110.
$nb0 print=0 $end
$DEL
  Lewis
$END
--Link1--
%mem=2gb
%nprocshared=8
%chk=rot_barr
#b3lyp/6-311++g** pop=nbo7del nosymm opt=z-matrix
HOOH, E(DEL; tau=120)=-151.577639459 (0.09)
0 1
H
O  1  r2
O  2  r3  1  a3
H  3  r4  2  a4  1  tw
r2  0.9720
r3  1.5196
a3  95.41
r4  0.9720
a4  95.41
tw  120.
$nb0 print=0 $end
$DEL
  Lewis

```

```

$END
--Link1--
%mem=2gb
%nprocshared=8
%chk=rot_barr
#b3lyp/6-311++g** pop=nbo7del nosymm opt=z-matrix
HOOH, E(DEL; tau=130)=-151.577782480 (0.00)
0 1
H
O 1 r2
O 2 r3 1 a3
H 3 r4 2 a4 1 tw
r2 0.9720
r3 1.5196
a3 95.41
r4 0.9720
a4 95.41
tw 130.
$nbo print=0 $end
$DEL
Lewis
$END
--Link1--
%mem=2gb
%nprocshared=8
%chk=rot_barr
#b3lyp/6-311++g** pop=nbo7del nosymm opt=z-matrix
HOOH, E(DEL; tau=140)=-151.577686248 (0.06)
0 1
H
O 1 r2
O 2 r3 1 a3
H 3 r4 2 a4 1 tw
r2 0.9720
r3 1.5196
a3 95.41
r4 0.9720
a4 95.41
tw 140.
$nbo print=0 $end
$DEL
Lewis
$END
--Link1--
%mem=2gb
%nprocshared=8
%chk=rot_barr
#b3lyp/6-311++g** pop=nbo7del nosymm opt=z-matrix
HOOH, E(DEL; tau=150)=-151.577450750 (0.21)
0 1
H
O 1 r2
O 2 r3 1 a3
H 3 r4 2 a4 1 tw
r2 0.9714
r3 1.5212
a3 95.54
r4 0.9714
a4 95.54
tw 150.
$nbo print=0 $end
$DEL
Lewis
$END
--Link1--
%mem=2gb
%nprocshared=8
%chk=rot_barr
#b3lyp/6-311++g** pop=nbo7del nosymm opt=z-matrix
HOOH, E(DEL; tau=160)=-151.577183862 (0.38)
0 1

```

```

H
O  1  r2
O  2  r3  1  a3
H  3  r4  2  a4  1  tw
r2  0.9712
r3  1.5214
a3  95.58
r4  0.9712
a4  95.58
tw  160.
$nb0 print=0 $end
$DEL
Lewis
$END
--Link1--
%mem=2gb
%nprocshared=8
%chk=rot_barr
#b3lyp/6-311++g** pop=nbo7del nosymm opt=z-matrix
HOOH, E(DEL; tau=170)=-151.576981609 (0.50)
0 1
H
O  1  r2
O  2  r3  1  a3
H  3  r4  2  a4  1  tw
r2  0.9711
r3  1.5219
a3  95.64
r4  0.9711
a4  95.64
tw  170.
$nb0 print=0 $end
$DEL
Lewis
$END
--Link1--
%mem=2gb
%nprocshared=8
%chk=rot_barr
#b3lyp/6-311++g** pop=nbo7del nosymm opt=z-matrix
HOOH, E(DEL; tau=180)=-151.576907220 (0.55)
0 1
H
O  1  r2
O  2  r3  1  a3
H  3  r4  2  a4  1  tw
r2  0.9711
r3  1.5222
a3  95.66
r4  0.9711
a4  95.66
tw  180.
$nb0 print=0 $end
$DEL
Lewis
$END
--Link1--
--Link1--
%mem=2gb
%nprocshared=8
%chk=rot_barr
#b3lyp/6-311++g** pop=nbo7read nosymm opt=z-matrix freq
CH3CH3, E(full)=-79.8565752846
nu: 307,827(2),...
Vibrational temperatures:   442.41  1189.83  1189.97  1432.90  1751.90
                             (Kelvin)  1751.96  2026.18  2047.75  2162.85  2162.97
                             2165.96  2166.09  4350.46  4350.69  4416.15
                             4416.26  4452.09  4452.20
Zero-point correction=      0.074307 (Hartree/Particle)
Thermal correction to Energy= 0.077794
Thermal correction to Enthalpy= 0.078738

```

```

Thermal correction to Gibbs Free Energy=      0.051189
Sum of electronic and zero-point Energies=    -79.782268
Sum of electronic and thermal Energies=       -79.778781
Sum of electronic and thermal Enthalpies=     -79.777837
Sum of electronic and thermal Free Energies=   -79.805386
0 1
C
C 1 r2
H 1 r3 2 a3
H 1 r4 2 a4 3 d4
H 1 r5 2 a5 4 d5
H 2 r6 1 a6 3 tw
H 2 r7 1 a7 6 d7
H 2 r8 1 a8 7 d8
r2 1.5309
r3 1.0937
a3 111.36
r4 1.0937
a4 111.35
d4 119.98
r5 1.0937
a5 111.36
d5 120.01
r6 1.0937
a6 111.36
tw 60.12
r7 1.0937
a7 111.35
d7 119.98
r8 1.0937
a8 111.36
d8 120.01
$nb0 file=ch3ch3 $end
--Link1--
--Link1--
%mem=2gb
%nprocshared=8
%chk=rot_barr
#b3lyp/6-311++g** nosymm opt=(ts,z-matrix,calcfc) freq
CH3CH3 (eclipsed t.s.), -79.8522677640
nu: -299,896(2),991,...
Vibrational temperatures: 1288.47 1288.52 1426.25 1683.22 1683.24
(Kelvin) 2023.87 2069.64 2160.67 2160.73 2173.64
2173.69 4361.51 4371.92 4429.42 4429.46
4462.17 4462.21
Zero-point correction= 0.073864 (Hartree/Particle)
Thermal correction to Energy= 0.076915
Thermal correction to Enthalpy= 0.077859
Thermal correction to Gibbs Free Energy= 0.050985
Sum of electronic and zero-point Energies= -79.778404
Sum of electronic and thermal Energies= -79.775353
Sum of electronic and thermal Enthalpies= -79.774409
Sum of electronic and thermal Free Energies= -79.801283
0 1
C
C 1 r2
H 1 r3 2 a3
H 1 r4 2 a4 3 d4
H 1 r5 2 a5 4 d5
H 2 r6 1 a6 3 tw
H 2 r7 1 a7 6 d7
H 2 r8 1 a8 7 d8
r2 1.5447
r3 1.0925
a3 111.79
r4 1.0925
a4 111.79
d4 120.00
r5 1.0925
a5 111.79
d5 120.00

```

```

r6 1.0925
a6 111.79
r7 1.0925
a7 111.79
d7 120.00
r8 1.0925
a8 111.79
d8 120.00
tw 0.
$nb0 file=ch3ch3_ecl archive nrt plot steric $end
--Link1--
--Link1--
%mem=2gb
%nprocshared=8
%chk=rot_barr
#b3lyp/6-311++g** pop=nbo7del nosymm freq
CH3CH3, E(DEL)=-79.817928022 (YYYY) (0.00)
nu: 29,918(2),938,1219(2),1475,1518,1599(2),1602(2),3130(2),3144(2),3253,3284
Vibrational temperatures:    41.86 1320.25 1320.34 1350.26 1753.47
(Kelvin)                    1753.50 2122.29 2184.01 2299.29 2299.97
                             2305.30 2305.98 4503.55 4503.77 4523.09
                             4523.32 4681.05 4725.22
Zero-point correction=      0.076821 (Hartree/Particle)
Thermal correction to Energy= 0.080735
Thermal correction to Enthalpy= 0.081679
Thermal correction to Gibbs Free Energy= 0.051902
Sum of electronic and zero-point Energies= -79.741107
Sum of electronic and thermal Energies= -79.737193
Sum of electronic and thermal Enthalpies= -79.736249
Sum of electronic and thermal Free Energies= -79.766026
0 1
C
C 1 r2
H 1 r3 2 a3
H 1 r4 2 a4 3 d4
H 1 r5 2 a5 4 d5
H 2 r6 1 a6 3 tw
H 2 r7 1 a7 6 d7
H 2 r8 1 a8 7 d8
r2 1.6826
r3 1.0928
a3 109.74
r4 1.0928
a4 109.74
d4 120.00
r5 1.0928
a5 109.74
d5 120.00
r6 1.0928
a6 109.74
tw 63.26
r7 1.0928
a7 109.74
d7 119.99
r8 1.0928
a8 109.74
d8 120.00

$nb0 print=0 $end
$DEL
Lewis
$END
--Link1--
--Link1--
%mem=2gb
%nprocshared=8
%chk=rot_barr
#b3lyp/6-311++g** nosymm opt=modredundant
CH3CH3 barrier, E(full)
Summary of Optimized Potential Surface Scan (add -79.0 to energies):

```



|            |                  | 1                | 2                | 3                | 4          |
|------------|------------------|------------------|------------------|------------------|------------|
| 5          | Eigenvalues --   |                  |                  |                  |            |
| (1.29)     | -0.855569 (0.63) | -0.852268 (2.70) | -0.852584 (2.50) | -0.853423 (1.98) | -0.854520  |
|            | R1               | 1.544148         | 1.543269         | 1.540409         | 1.536779   |
| 1.533572   | R2               | 1.092586         | 1.092665         | 1.092813         | 1.093072   |
| 1.093356   | R3               | 1.092587         | 1.092230         | 1.092139         | 1.092399   |
| 1.092801   | R4               | 1.092586         | 1.093070         | 1.093659         | 1.094069   |
| 1.094188   | R5               | 1.092586         | 1.092665         | 1.092813         | 1.093072   |
| 1.093356   | R6               | 1.092587         | 1.092230         | 1.092139         | 1.092399   |
| 1.092801   | R7               | 1.092586         | 1.093070         | 1.093659         | 1.094069   |
| 1.094188   | A1               | 111.806253       | 111.758520       | 111.649178       | 111.518526 |
| 111.407470 | A2               | 111.805871       | 112.046617       | 112.131997       | 112.068873 |
| 111.876239 | A3               | 111.805901       | 111.496508       | 111.229159       | 111.085747 |
| 111.073808 | A4               | 107.038763       | 107.717215       | 108.234283       | 108.460842 |
| 108.374103 | A5               | 107.038943       | 106.435767       | 106.097952       | 106.126374 |
| 106.445440 | A6               | 107.038906       | 107.080920       | 107.201209       | 107.304672 |
| 107.419792 | A7               | 111.806253       | 111.758520       | 111.649177       | 111.518522 |
| 111.407466 | A8               | 111.805860       | 112.046619       | 112.132005       | 112.068874 |
| 111.876241 | A9               | 111.805911       | 111.496505       | 111.229154       | 111.085751 |
| 111.073806 | A10              | 107.038789       | 107.717212       | 108.234259       | 108.460847 |
| 108.374101 | A11              | 107.038916       | 106.435769       | 106.097975       | 106.126368 |
| 106.445443 | A12              | 107.038906       | 107.080921       | 107.201207       | 107.304671 |
| 107.419794 | D1               | -0.000009        | 10.000183        | 20.000306        | 30.000412  |
| 40.000308  | D2               | 119.999953       | 131.007720       | 141.659087       | 151.813138 |
| 161.484589 | D3               | -120.000171      | -108.987028      | -98.308963       | -88.165206 |
| -78.485998 | D4               | 119.999927       | 131.007722       | 141.659112       | 151.813133 |
| 161.484593 | D5               | -120.000110      | -107.984742      | -96.682107       | -86.374142 |
| -77.031126 | D6               | -0.000234        | 12.020510        | 23.349843        | 33.647515  |
| 42.998287  | D7               | -120.000197      | -108.987027      | -98.308937       | -88.165213 |
| -78.485997 | D8               | -0.000234        | 12.020510        | 23.349844        | 33.647512  |
| 42.998284  | D9               | 119.999641       | 132.025762       | 143.381794       | 153.669169 |
| 163.027697 |                  |                  |                  |                  |            |
|            |                  | 6                | 7                | 8                | 9          |
| 10         | Eigenvalues --   |                  |                  |                  |            |
| (0.63)     | -0.854517 (1.29) | -0.856309 (0.17) | -0.856575 (0.00) | -0.856309 (0.17) | -0.855567  |
|            | R1               | 1.531433         | 1.530681         | 1.531412         | 1.533534   |
| 1.536717   | R2               | 1.093561         | 1.093681         | 1.093639         | 1.093497   |
| 1.093221   | R3               | 1.093275         | 1.093706         | 1.094028         | 1.094122   |
| 1.093982   |                  |                  |                  |                  |            |

|             |                  |                  |                  |                  |             |
|-------------|------------------|------------------|------------------|------------------|-------------|
| 1.092377    | R4               | 1.094047         | 1.093690         | 1.093236         | 1.092755    |
|             | R5               | 1.093561         | 1.093681         | 1.093639         | 1.093497    |
| 1.093221    | R6               | 1.093275         | 1.093706         | 1.094028         | 1.094122    |
| 1.093982    | R7               | 1.094047         | 1.093690         | 1.093236         | 1.092755    |
| 1.092377    | A1               | 111.338211       | 111.355649       | 111.424669       | 111.547763  |
| 111.644941  | A2               | 111.624781       | 111.345250       | 111.127259       | 110.991706  |
| 111.028661  | A3               | 111.176512       | 111.361326       | 111.589961       | 111.826185  |
| 112.013305  | A4               | 108.033110       | 107.523392       | 106.958091       | 106.455977  |
| 106.146932  | A5               | 106.955006       | 107.512501       | 108.015078       | 108.327345  |
| 108.398476  | A6               | 107.497109       | 107.537608       | 107.509527       | 107.447485  |
| 107.332900  | A7               | 111.338208       | 111.355645       | 111.424672       | 111.547763  |
| 111.644952  | A8               | 111.624783       | 111.345248       | 111.127260       | 110.991693  |
| 111.028662  | A9               | 111.176517       | 111.361323       | 111.589972       | 111.826176  |
| 112.013318  | A10              | 108.033122       | 107.523391       | 106.958102       | 106.455973  |
| 106.146932  | A11              | 106.954991       | 107.512507       | 108.015058       | 108.327362  |
| 108.398460  | A12              | 107.497106       | 107.537613       | 107.509520       | 107.447495  |
| 107.332889  | D1               | 50.000251        | 60.000347        | 70.000368        | 80.000106   |
| 90.000279   | D2               | 170.822613       | 179.994025       | -170.821384      | -161.462896 |
| -151.763633 | D3               | -69.149591       | -59.990399       | -50.834872       | -41.488333  |
| -31.783080  | D4               | 170.822598       | 179.994031       | -170.821400      | -161.462883 |
| -151.763641 | D5               | -68.355040       | -60.012291       | -51.643152       | -42.925885  |
| -33.527553  | D6               | 51.672756        | 60.003285        | 68.343359        | 77.048679   |
| 86.452999   | D7               | -69.149608       | -59.990396       | -50.834888       | -41.488317  |
| -31.783084  | D8               | 51.672753        | 60.003282        | 68.343360        | 77.048681   |
| 86.453003   | D9               | 171.700550       | -179.981142      | -171.670128      | -162.976755 |
| -153.566444 |                  | 11               | 12               | 13               | 14          |
| 15          |                  |                  |                  |                  |             |
|             | Eigenvalues --   | -0.853420 (1.98) | -0.852582 (2.51) | -0.852268 (2.70) | -0.852583   |
| (2.51)      | -0.853422 (1.98) |                  |                  |                  |             |
|             | R1               | 1.540314         | 1.543267         | 1.544452         | 1.543318    |
| 1.540365    | R2               | 1.092941         | 1.092670         | 1.092556         | 1.092600    |
| 1.092818    | R3               | 1.093556         | 1.093023         | 1.092515         | 1.092256    |
| 1.092266    | R4               | 1.092170         | 1.092224         | 1.092539         | 1.093037    |
| 1.093550    | R5               | 1.092941         | 1.092670         | 1.092556         | 1.092600    |
| 1.092818    | R6               | 1.093556         | 1.093023         | 1.092515         | 1.092256    |
| 1.092266    | R7               | 1.092169         | 1.092224         | 1.092539         | 1.093037    |
| 1.093550    | A1               | 111.725507       | 111.757957       | 111.766122       | 111.743338  |
| 111.679394  |                  |                  |                  |                  |             |

|            |     |             |             |             |             |
|------------|-----|-------------|-------------|-------------|-------------|
| 112.169238 | A2  | 111.200553  | 111.499814  | 111.810451  | 112.056826  |
| 111.167237 | A3  | 112.107349  | 112.042053  | 111.820366  | 111.487735  |
| 108.201317 | A4  | 106.132485  | 106.456783  | 107.040433  | 107.694986  |
| 106.157335 | A5  | 108.151903  | 107.658630  | 107.024061  | 106.467789  |
| 107.168341 | A6  | 107.225764  | 107.121207  | 107.074902  | 107.086248  |
| 111.679392 | A7  | 111.725503  | 111.757959  | 111.766112  | 111.743338  |
| 112.169253 | A8  | 111.200544  | 111.499831  | 111.810463  | 112.056851  |
| 111.167217 | A9  | 112.107335  | 112.042058  | 111.820349  | 111.487724  |
| 108.201309 | A10 | 106.132474  | 106.456763  | 107.040410  | 107.694963  |
| 106.157350 | A11 | 108.151932  | 107.658634  | 107.024093  | 106.467803  |
| 107.168341 | A12 | 107.225774  | 107.121198  | 107.074910  | 107.086241  |
| 140.000309 | D1  | 100.000227  | 110.000265  | 120.000334  | 130.000335  |
| -98.335043 | D2  | -141.615909 | -130.984015 | -120.022244 | -109.024410 |
| 21.637372  | D3  | -21.589281  | -10.928034  | 0.036961    | 10.988593   |
| -98.335042 | D4  | -141.615888 | -130.984002 | -120.022215 | -109.024398 |
| 23.329607  | D5  | -23.232024  | -11.968283  | -0.044793   | 11.950856   |
| 143.302021 | D6  | 96.794604   | 108.087699  | 120.014412  | 131.963859  |
| 21.637376  | D7  | -21.589257  | -10.928024  | 0.036984    | 10.988604   |
| 143.302024 | D8  | 96.794607   | 108.087696  | 120.014406  | 131.963859  |
| -96.725561 | D9  | -143.178765 | -131.856323 | -119.926389 | -108.023138 |

|                |  | 16               | 17               | 18               | 19          |
|----------------|--|------------------|------------------|------------------|-------------|
| Eigenvalues -- |  | -0.854521 (1.29) | -0.855570 (0.63) | -0.856310 (0.17) | -0.856575   |
| (0.00)         |  |                  |                  |                  |             |
| R1             |  | 1.536752         | 1.533546         | 1.531410         | 1.530662    |
| R2             |  | 1.093112         | 1.093402         | 1.093598         | 1.093664    |
| R3             |  | 1.092516         | 1.092892         | 1.093330         | 1.093740    |
| R4             |  | 1.093919         | 1.094055         | 1.093960         | 1.093687    |
| R5             |  | 1.093112         | 1.093402         | 1.093598         | 1.093664    |
| R6             |  | 1.092516         | 1.092892         | 1.093331         | 1.093741    |
| R7             |  | 1.093919         | 1.094055         | 1.093960         | 1.093686    |
| A1             |  | 111.577630       | 111.463295       | 111.371380       | 111.328778  |
| A2             |  | 112.133656       | 111.953155       | 111.678861       | 111.373092  |
| A3             |  | 110.964690       | 110.944481       | 111.096256       | 111.373554  |
| A4             |  | 108.423435       | 108.342536       | 108.011031       | 107.518058  |
| A5             |  | 106.176184       | 106.480607       | 106.969426       | 107.513786  |
| A6             |  | 107.286887       | 107.410030       | 107.496347       | 107.527564  |
| A7             |  | 111.577633       | 111.463293       | 111.371387       | 111.328785  |
| A8             |  | 112.133678       | 111.953178       | 111.678903       | 111.373140  |
| A9             |  | 110.964673       | 110.944455       | 111.096220       | 111.373495  |
| A10            |  | 108.423432       | 108.342543       | 108.011038       | 107.518073  |
| A11            |  | 106.176182       | 106.480604       | 106.969411       | 107.513774  |
| A12            |  | 107.286882       | 107.410031       | 107.496340       | 107.527565  |
| D1             |  | 150.000230       | 160.000329       | 170.000247       | -179.999769 |
| D2             |  | -88.146321       | -78.461885       | -69.145089       | -60.012148  |
| D3             |  | 31.812980        | 41.518322        | 50.863561        | 60.017826   |
| D4             |  | -88.146336       | -78.461910       | -69.145132       | -60.012204  |
| D5             |  | 33.707113        | 43.075875        | 51.709531        | 59.975417   |
| D6             |  | 153.666414       | 163.056083       | 171.718182       | -179.994609 |
| D7             |  | 31.812968        | 41.518300        | 50.863523        | 60.017776   |
| D8             |  | 153.666417       | 163.056085       | 171.718186       | -179.994603 |
| D9             |  | -86.374282       | -76.963708       | -68.273163       | -59.964629  |

```

0 1
C
C 1 r2
H 1 r3 2 a3
H 1 r4 2 a4 3 d4
H 1 r5 2 a5 4 d5
H 2 r6 1 a6 3 tw
H 2 r7 1 a7 6 d7
H 2 r8 1 a8 7 d8
r2 1.6826
r3 1.0928
a3 109.74
r4 1.0928
a4 109.74
d4 120.00
r5 1.0928
a5 109.74
d5 120.00
r6 1.0928
a6 109.74
r7 1.0928
a7 109.74
d7 119.99
r8 1.0928
a8 109.74
d8 120.00
tw 0.

3 1 2 6 S 18 10.
--Link1--
%mem=2gb
%nprocshared=8
%chk=rot_barr
#b3lyp/6-311++g** pop=nbo7del nosymm opt=z-matrix
CH3CH3 barrier, E(DEL), tau=0,-79.817850906 (0.05)
0 1
C
C 1 r2
H 1 r3 2 a3
H 1 r4 2 a4 3 d4
H 1 r5 2 a5 4 d5
H 2 r6 1 a6 3 tw
H 2 r7 1 a7 6 d7
H 2 r8 1 a8 7 d8
r2 1.6775
r3 1.0929
a3 109.67
r4 1.0929
a4 109.67
d4 120.00
r5 1.0929
a5 109.67
d5 120.00
r6 1.0929
a6 109.67
r7 1.0929
a7 109.67
d7 120.00
r8 1.0929
a8 109.67
d8 120.00
tw 0.

$nbo print=0 $end
$DEL
Lewis
$END
--Link1--
%mem=2gb
%nprocshared=8
%chk=rot_barr

```

```

#b3lyp/6-311++g** pop=nbo7del nosymm opt=z-matrix
CH3CH3 barrier, E(DEL), tau=10,-79.817857087 (0.04)
0 1
C
C 1 r2
H 1 r3 2 a3
H 1 r4 2 a4 3 d4
H 1 r5 2 a5 4 d5
H 2 r6 1 a6 3 tw
H 2 r7 1 a7 6 d7
H 2 r8 1 a8 7 d8
r2 1.6778
r3 1.0929
a3 109.67
r4 1.0929
a4 109.68
d4 120.01
r5 1.0929
a5 109.67
d5 120.00
r6 1.0929
a6 109.67
r7 1.0929
a7 109.68
d7 120.01
r8 1.0929
a8 109.67
d8 120.00
tw 10.

```

```

$nb0 print=0 $end
$DEL
Lewis
$END
--Link1--
%mem=2gb
%nprocshared=8
%chk=rot_barr
#b3lyp/6-311++g** pop=nbo7del nosymm opt=z-matrix
CH3CH3 barrier, E(DEL), tau=20,-79.817873243 (0.03)
0 1

```

```

C
C 1 r2
H 1 r3 2 a3
H 1 r4 2 a4 3 d4
H 1 r5 2 a5 4 d5
H 2 r6 1 a6 3 tw
H 2 r7 1 a7 6 d7
H 2 r8 1 a8 7 d8
r2 1.6788
r3 1.0929
a3 109.68
r4 1.0928
a4 109.69
d4 120.02
r5 1.0929
a5 109.68
d5 120.00
r6 1.0929
a6 109.68
r7 1.0928
a7 109.69
d7 120.02
r8 1.0929
a8 109.68
d8 120.00
tw 20.

```

```

$nb0 print=0 $end
$DEL
Lewis

```

```

$END
--Link1--
%mem=2gb
%nprocshared=8
%chk=rot_barr
#b3lyp/6-311++g** pop=nbo7del nosymm opt=z-matrix
CH3CH3 barrier, E(DEL), tau=30,-79.817892776 (0.02)
0 1
C
C 1 r2
H 1 r3 2 a3
H 1 r4 2 a4 3 d4
H 1 r5 2 a5 4 d5
H 2 r6 1 a6 3 tw
H 2 r7 1 a7 6 d7
H 2 r8 1 a8 7 d8
r2 1.6798
r3 1.0928
a3 109.66
r4 1.0928
a4 109.66
d4 120.03
r5 1.0928
a5 109.66
d5 120.01
r6 1.0928
a6 109.66
r7 1.0928
a7 109.65
d7 120.03
r8 1.0928
a8 109.66
d8 120.02
tw 30.

```

```

$nbo print=0 $end
$DEL
Lewis
$END
--Link1--
%mem=2gb
%nprocshared=8
%chk=rot_barr
#b3lyp/6-311++g** pop=nbo7del nosymm opt=z-matrix
CH3CH3 barrier, E(DEL), tau=40,-79.817850906 (0.05)
0 1
C
C 1 r2
H 1 r3 2 a3
H 1 r4 2 a4 3 d4
H 1 r5 2 a5 4 d5
H 2 r6 1 a6 3 tw
H 2 r7 1 a7 6 d7
H 2 r8 1 a8 7 d8
r2 1.6775
r3 1.0929
a3 109.67
r4 1.0929
a4 109.67
d4 120.00
r5 1.0929
a5 109.67
d5 120.00
r6 1.0929
a6 109.67
r7 1.0929
a7 109.67
d7 120.00
r8 1.0929
a8 109.67
d8 120.00

```

```

tw 40.

$nb0 print=0 $end
$DEL
  Lewis
$END
--Link1--
%mem=2gb
%nprocshared=8
%chk=rot_barr
#b3lyp/6-311++g** pop=nbo7del nosymm opt=z-matrix
CH3CH3 barrier, E(DEL), tau=50,-79.817924097 (0.00)
0 1
C
C 1 r2
H 1 r3 2 a3
H 1 r4 2 a4 3 d4
H 1 r5 2 a5 4 d5
H 2 r6 1 a6 3 tw
H 2 r7 1 a7 6 d7
H 2 r8 1 a8 7 d8
r2 1.6826
r3 1.0928
a3 109.74
r4 1.0928
a4 109.74
d4 120.00
r5 1.0928
a5 109.74
d5 120.00
r6 1.0928
a6 109.74
r7 1.0928
a7 109.74
d7 119.99
r8 1.0928
a8 109.74
d8 120.00
tw 50.

```

```

$nb0 print=0 $end
$DEL
  Lewis
$END
--Link1--
%mem=2gb
%nprocshared=8
%chk=rot_barr
#b3lyp/6-311++g** pop=nbo7del nosymm opt=z-matrix
CH3CH3 barrier, E(DEL), tau=60,-79.817928455 (0.00)
0 1
C
C 1 r2
H 1 r3 2 a3
H 1 r4 2 a4 3 d4
H 1 r5 2 a5 4 d5
H 2 r6 1 a6 3 tw
H 2 r7 1 a7 6 d7
H 2 r8 1 a8 7 d8
r2 1.6826
r3 1.0928
a3 109.74
r4 1.0928
a4 109.74
d4 120.00
r5 1.0928
a5 109.74
d5 120.00
r6 1.0928
a6 109.74
r7 1.0928

```

```

a7 109.74
d7 119.99
r8 1.0928
a8 109.74
d8 120.00
tw 60.

$nb0 print=0 $end
$DEL
  Lewis
$END
--Link1--
%mem=2gb
%nprocshared=8
%chk=rot_barr
#b3lyp/6-311++g** pop=nbo7del nosymm opt=z-matrix
CH3CH3 barrier, E(DEL), tau=70,-79.817924132 (0.00)
0 1
C
C 1 r2
H 1 r3 2 a3
H 1 r4 2 a4 3 d4
H 1 r5 2 a5 4 d5
H 2 r6 1 a6 3 tw
H 2 r7 1 a7 6 d7
H 2 r8 1 a8 7 d8
r2 1.6826
r3 1.0928
a3 109.74
r4 1.0928
a4 109.74
d4 120.00
r5 1.0928
a5 109.74
d5 120.00
r6 1.0928
a6 109.74
r7 1.0928
a7 109.74
d7 119.99
r8 1.0928
a8 109.74
d8 120.00
tw 70.

```

```

$nb0 print=0 $end
$DEL
  Lewis
$END
--Link1--
%mem=2gb
%nprocshared=8
%chk=rot_barr
#b3lyp/6-311++g** pop=nbo7del nosymm opt=z-matrix
CH3CH3 barrier, E(DEL), tau=80,-79.817911711 (0.01)
0 1
C
C 1 r2
H 1 r3 2 a3
H 1 r4 2 a4 3 d4
H 1 r5 2 a5 4 d5
H 2 r6 1 a6 3 tw
H 2 r7 1 a7 6 d7
H 2 r8 1 a8 7 d8
r2 1.6812
r3 1.0928
a3 109.70
r4 1.0928
a4 109.70
d4 119.98
r5 1.0928

```



```

a5 109.70
d5 119.99
r6 1.0928
a6 109.70
r7 1.0928
a7 109.70
d7 119.98
r8 1.0928
a8 109.70
d8 120.00
tw 80.

```

```

$nb0 print=0 $end
$DEL
  Lewis
$END
--Link1--
%mem=2gb
%nprocshared=8
%chk=rot_barr
#b3lyp/6-311++g** pop=nbo7del nosymm opt=z-matrix
CH3CH3 barrier, E(DEL), tau=90, -79.817892715 (0.02)
0 1
C
C 1 r2
H 1 r3 2 a3
H 1 r4 2 a4 3 d4
H 1 r5 2 a5 4 d5
H 2 r6 1 a6 3 tw
H 2 r7 1 a7 6 d7
H 2 r8 1 a8 7 d8
r2 1.6798
r3 1.0928
a3 109.66
r4 1.0928
a4 109.66
d4 119.97
r5 1.0928
a5 109.66
d5 119.99
r6 1.0928
a6 109.66
r7 1.0928
a7 109.65
d7 119.97
r8 1.0928
a8 109.66
d8 119.99
tw 90.

```

```

$nb0 print=0 $end
$DEL
  Lewis
$END
--Link1--
%mem=2gb
%nprocshared=8
%chk=rot_barr
#b3lyp/6-311++g** pop=nbo7del nosymm opt=z-matrix
CH3CH3 barrier, E(DEL), tau=100, -79.817873261 (0.03)
0 1
C
C 1 r2
H 1 r3 2 a3
H 1 r4 2 a4 3 d4
H 1 r5 2 a5 4 d5
H 2 r6 1 a6 3 tw
H 2 r7 1 a7 6 d7
H 2 r8 1 a8 7 d8
r2 1.6788
r3 1.0929

```

```

a3 109.70
r4 1.0929
a4 109.68
d4 119.98
r5 1.0928
a5 109.69
d5 120.00
r6 1.0929
a6 109.69
r7 1.0929
a7 109.68
d7 119.98
r8 1.0928
a8 109.69
d8 120.00
tw 100.

```

```

$nb0 print=0 $end
$DEL
  Lewis
$END
--Link1--
%mem=2gb
%nprocshared=8
%chk=rot_barr
#b3lyp/6-311++g** pop=nbo7del nosymm opt=z-matrix
CH3CH3 barrier, E(DEL), tau=110,-79.817857100 (0.04)
0 1
C
C 1 r2
H 1 r3 2 a3
H 1 r4 2 a4 3 d4
H 1 r5 2 a5 4 d5
H 2 r6 1 a6 3 tw
H 2 r7 1 a7 6 d7
H 2 r8 1 a8 7 d8
r2 1.6778
r3 1.0929
a3 109.68
r4 1.0929
a4 109.67
d4 119.99
r5 1.0929
a5 109.68
d5 120.00
r6 1.0929
a6 109.68
r7 1.0929
a7 109.67
d7 119.99
r8 1.0929
a8 109.68
d8 120.00
tw 110.

```

```

$nb0 print=0 $end
$DEL
  Lewis
$END
--Link1--
%mem=2gb
%nprocshared=8
%chk=rot_barr
#b3lyp/6-311++g** pop=nbo7del nosymm opt=z-matrix
CH3CH3 barrier, E(DEL), tau=120,-79.817850906 (0.05)
0 1
C
C 1 r2
H 1 r3 2 a3
H 1 r4 2 a4 3 d4
H 1 r5 2 a5 4 d5

```

```

H 2 r6 1 a6 3 tw
H 2 r7 1 a7 6 d7
H 2 r8 1 a8 7 d8
r2 1.6775
r3 1.0929
a3 109.67
r4 1.0929
a4 109.67
d4 120.00
r5 1.0929
a5 109.67
d5 120.00
r6 1.0929
a6 109.67
r7 1.0929
a7 109.67
d7 120.00
r8 1.0929
a8 109.67
d8 120.00
tw 120.

```

```

$nb0 print=0 $end
$DEL
Lewis
$END
--Link1--
%mem=2gb
%nprocshared=8
%chk=rot_barr
#b3lyp/6-311++g** pop=nbo7del nosymm opt=z-matrix
CH3CH3 barrier, E(DEL), tau=130,-79.817857086 (0.04)
0 1

```

```

C
C 1 r2
H 1 r3 2 a3
H 1 r4 2 a4 3 d4
H 1 r5 2 a5 4 d5
H 2 r6 1 a6 3 tw
H 2 r7 1 a7 6 d7
H 2 r8 1 a8 7 d8
r2 1.6778
r3 1.0929
a3 109.67
r4 1.0929
a4 109.68
d4 120.01
r5 1.0929
a5 109.67
d5 120.00
r6 1.0929
a6 109.67
r7 1.0929
a7 109.68
d7 120.01
r8 1.0929
a8 109.67
d8 120.00
tw 130.

```

```

$nb0 print=0 $end
$DEL
Lewis
$END
--Link1--
%mem=2gb
%nprocshared=8
%chk=rot_barr
#b3lyp/6-311++g** pop=nbo7del nosymm opt=z-matrix
CH3CH3 barrier, E(DEL), tau=140,-79.817873244 (0.03)
0 1

```

```

C
C 1 r2
H 1 r3 2 a3
H 1 r4 2 a4 3 d4
H 1 r5 2 a5 4 d5
H 2 r6 1 a6 3 tw
H 2 r7 1 a7 6 d7
H 2 r8 1 a8 7 d8
r2 1.6788
r3 1.0929
a3 109.68
r4 1.0928
a4 109.69
d4 120.02
r5 1.0929
a5 109.68
d5 120.00
r6 1.0929
a6 109.68
r7 1.0928
a7 109.69
d7 120.02
r8 1.0928
a8 109.68
d8 120.00
tw 140.

$nb0 print=0 $end
$DEL
Lewis
$END
--Link1--
%mem=2gb
%nprocshared=8
%chk=rot_barr
#b3lyp/6-311++g** pop=nb07del nosymm opt=z-matrix
CH3CH3 barrier, E(DEL), tau=150,-79.817892775 (0.02)
0 1
C
C 1 r2
H 1 r3 2 a3
H 1 r4 2 a4 3 d4
H 1 r5 2 a5 4 d5
H 2 r6 1 a6 3 tw
H 2 r7 1 a7 6 d7
H 2 r8 1 a8 7 d8
r2 1.6798
r3 1.0928
a3 109.66
r4 1.0928
a4 109.66
d4 120.02
r5 1.0928
a5 109.66
d5 120.01
r6 1.0928
a6 109.66
r7 1.0928
a7 109.65
d7 120.03
r8 1.0928
a8 109.66
d8 120.02
tw 150.

$nb0 print=0 $end
$DEL
Lewis
$END
--Link1--
%mem=2gb

```

```

%nprocshared=8
%chk=rot_barr
#b3lyp/6-311++g** pop=nbo7del nosymm opt=z-matrix
CH3CH3 barrier, E(DEL), tau=160,-79.817911752 (0.01)
0 1
C
C 1 r2
H 1 r3 2 a3
H 1 r4 2 a4 3 d4
H 1 r5 2 a5 4 d5
H 2 r6 1 a6 3 tw
H 2 r7 1 a7 6 d7
H 2 r8 1 a8 7 d8
r2 1.6812
r3 1.0928
a3 109.70
r4 1.0928
a4 109.70
d4 120.02
r5 1.0928
a5 109.70
d5 120.01
r6 1.0928
a6 109.70
r7 1.0928
a7 109.69
d7 120.02
r8 1.0928
a8 109.70
d8 120.01
tw 160.

```

```
$nbo print=0 $end
```

```
$DEL
```

```
Lewis
```

```
$END
```

```
--Link1--
```

```
%mem=2gb
```

```
%nprocshared=8
```

```
%chk=rot_barr
```

```
#b3lyp/6-311++g** pop=nbo7del nosymm opt=z-matrix
CH3CH3 barrier, E(DEL), tau=170,-79.817924097 (0.002)
```

```
0 1
```

```
C
```

```

C 1 r2
H 1 r3 2 a3
H 1 r4 2 a4 3 d4
H 1 r5 2 a5 4 d5
H 2 r6 1 a6 3 tw
H 2 r7 1 a7 6 d7
H 2 r8 1 a8 7 d8

```

```
r2 1.6826
```

```
r3 1.0928
```

```
a3 109.74
```

```
r4 1.0928
```

```
a4 109.74
```

```
d4 120.00
```

```
r5 1.0928
```

```
a5 109.74
```

```
d5 120.00
```

```
r6 1.0928
```

```
a6 109.74
```

```
r7 1.0928
```

```
a7 109.74
```

```
d7 119.99
```

```
r8 1.0928
```

```
a8 109.74
```

```
d8 120.00
```

```
tw 170.
```

```
$nbo print=0 $end
```

```

$DEL
  Lewis
$END
--Link1--
%mem=2gb
%nprocshared=8
%chk=rot_barr
#b3lyp/6-311++g** pop=nbo7del nosymm opt=z-matrix
CH3CH3 barrier, E(DEL), tau=180,-79.817928455 (0.00)
0 1

```

```

C
C   1   r2
H   1   r3   2   a3
H   1   r4   2   a4   3   d4
H   1   r5   2   a5   4   d5
H   2   r6   1   a6   3   tw
H   2   r7   1   a7   6   d7
H   2   r8   1   a8   7   d8
r2  1.6826
r3  1.0928
a3  109.74
r4  1.0928
a4  109.74
d4  120.00
r5  1.0928
a5  109.74
d5  120.00
r6  1.0928
a6  109.74
r7  1.0928
a7  109.74
d7  119.99
r8  1.0928
a8  109.74
d8  120.00
tw  180.

```

```

$nbo print=0 $end

```

```

$DEL
  Lewis
$END
--Link1--
--Link1--
%mem=2gb
%nprocshared=8
%chk=rot_barr
#b3lyp/6-311++g** pop=nbo7read nosymm opt=z-matrix freq
CH3NH2, E(FULL)=-95.8938909670 (0.00)
nu: 304,821,973,...

```

|                                              |                             |         |         |         |         |
|----------------------------------------------|-----------------------------|---------|---------|---------|---------|
| Vibrational temperatures:                    | 437.08                      | 1180.77 | 1400.08 | 1518.14 | 1673.21 |
| (Kelvin)                                     | 1930.46                     | 2100.26 | 2154.21 | 2182.47 | 2398.47 |
|                                              | 4261.82                     | 4397.11 | 4448.64 | 5046.96 | 5158.75 |
| Zero-point correction=                       | 0.063793 (Hartree/Particle) |         |         |         |         |
| Thermal correction to Energy=                | 0.067231                    |         |         |         |         |
| Thermal correction to Enthalpy=              | 0.068175                    |         |         |         |         |
| Thermal correction to Gibbs Free Energy=     | 0.040861                    |         |         |         |         |
| Sum of electronic and zero-point Energies=   | -95.830098                  |         |         |         |         |
| Sum of electronic and thermal Energies=      | -95.826660                  |         |         |         |         |
| Sum of electronic and thermal Enthalpies=    | -95.825716                  |         |         |         |         |
| Sum of electronic and thermal Free Energies= | -95.853030                  |         |         |         |         |

```

0 1
C
N   1   r2
H   1   r3   2   a3
H   1   r4   2   a4   3   d4
H   1   r5   2   a5   4   d5
H   2   r6   1   a6   3   tw
H   2   r7   1   a7   6   d7
r2  1.4656
r3  1.0927
a3  109.18

```

```

r4 1.0928
a4 109.17
d4 116.82
r5 1.1003
a5 115.17
d5 121.58
r6 1.0141
a6 111.18
tw 61.90
r7 1.0141
a7 111.18
d7 119.37

```

```
$nbo file=ch3nh2 $end
```

```
--Link1--
```

```
--Link1--
```

```
%mem=2gb
```

```
%nprocshared=8
```

```
%chk=rot_barr
```

```
#b3lyp/6-311++g** pop=nbo7del nosymm freq
```

```
CH3NH2, E(DEL)=-95.846654215 (0.00)
```

```
nu: 36,898,969,...
```

|                           |         |         |         |         |         |
|---------------------------|---------|---------|---------|---------|---------|
| Vibrational temperatures: | 51.71   | 1292.39 | 1394.50 | 1517.79 | 1627.43 |
| (Kelvin)                  | 1928.36 | 2094.39 | 2265.24 | 2275.13 | 2521.01 |
|                           | 4585.94 | 4612.08 | 4793.03 | 5158.17 | 5251.56 |

```
Zero-point correction= 0.065503 (Hartree/Particle)
```

```
Thermal correction to Energy= 0.069373
```

```
Thermal correction to Enthalpy= 0.070317
```

```
Thermal correction to Gibbs Free Energy= 0.040963
```

```
Sum of electronic and zero-point Energies= -95.781151
```

```
Sum of electronic and thermal Energies= -95.777282
```

```
Sum of electronic and thermal Enthalpies= -95.776337
```

```
Sum of electronic and thermal Free Energies= -95.805691
```

```
0 1
```

```
C
```

```

N 1 r2
H 1 r3 2 a3
H 1 r4 2 a4 3 d4
H 1 r5 2 a5 4 d5
H 2 r6 1 a6 3 tw
H 2 r7 1 a7 6 d7

```

```
r2 1.6042
```

```
r3 1.0849
```

```
a3 107.90
```

```
r4 1.0857
```

```
a4 105.73
```

```
d4 119.78
```

```
r5 1.0848
```

```
a5 107.92
```

```
d5 119.80
```

```
r6 1.0111
```

```
a6 107.13
```

```
tw 2.16
```

```
r7 1.0111
```

```
a7 107.14
```

```
d7 115.17
```

```
$nbo print=0 $end
```

```
$DEL
```

```
Lewis
```

```
$END
```

```
--Link1--
```

```
--Link1--
```

```
%mem=2gb
```

```
%nprocshared=8
```

```
%chk=rot_barr
```

```
#b3lyp/6-311++g** nosymm opt=modredundant
```

```
CH3NH2 rot. barrier
```

```
Summary of Optimized Potential Surface Scan (add -95.0 to energies):
```

```
1 2 3
```

```
5
```

```
4
```

|                |                  |                  |                  |                  |             |
|----------------|------------------|------------------|------------------|------------------|-------------|
| Eigenvalues -- |                  | -0.890808 (1.93) | -0.891004 (1.81) | -0.891594 (1.44) | -0.892394   |
| (0.94)         | -0.893166 (0.45) |                  |                  |                  |             |
|                | R1               | 1.471384         | 1.472949         | 1.472153         | 1.470745    |
| 1.468483       | R2               | 1.093994         | 1.095362         | 1.096928         | 1.098369    |
| 1.099367       | R3               | 1.094804         | 1.094692         | 1.094726         | 1.094316    |
| 1.093885       | R4               | 1.094226         | 1.092759         | 1.091888         | 1.091465    |
| 1.091762       | R5               | 1.011117         | 1.012136         | 1.013169         | 1.014000    |
| 1.014499       | R6               | 1.011128         | 1.011990         | 1.013031         | 1.013936    |
| 1.014471       | A1               | 111.770082       | 112.802905       | 113.730522       | 114.415772  |
| 114.857730     | A2               | 110.683928       | 110.341061       | 110.004530       | 109.641919  |
| 109.418698     | A3               | 111.901829       | 111.073137       | 110.344165       | 109.741145  |
| 109.386027     | A4               | 107.581067       | 107.341744       | 107.148686       | 107.148760  |
| 107.351859     | A5               | 107.105543       | 107.642559       | 108.118827       | 108.415452  |
| 108.403118     | A6               | 107.574278       | 107.408973       | 107.240830       | 107.209553  |
| 107.137481     | A7               | 112.223747       | 111.824287       | 111.466379       | 111.154770  |
| 111.033789     | A8               | 112.226026       | 111.541097       | 110.964480       | 110.558014  |
| 110.546470     | A9               | 107.828645       | 106.991515       | 106.351471       | 106.074983  |
| 106.197257     | D1               | -0.000157        | -9.999916        | -20.000124       | -30.000380  |
| -40.000506     | D2               | 121.616998       | 109.769330       | 98.334943        | 87.530401   |
| 77.599131      | D3               | 119.896748       | 110.046890       | 100.185842       | 90.386599   |
| 80.785680      | D4               | -118.486096      | -130.183865      | -141.479092      | -152.082620 |
| -161.614684    | D5               | -120.127145      | -130.953111      | -141.689417      | -152.107252 |
| -162.132411    | D6               | 1.490010         | -11.183865       | -23.354351       | -34.576471  |
| -44.532774     | D7               | 0.000157         | 9.999916         | 20.000124        | 30.000380   |
| 40.000506      |                  | 6                | 7                | 8                | 9           |
| 10             |                  |                  |                  |                  |             |
| Eigenvalues -- |                  | -0.893707 (0.12) | -0.893891 (0.00) | -0.893687 (0.13) | -0.893151   |
| (0.46)         | -0.892414 (0.93) |                  |                  |                  |             |
|                | R1               | 1.466938         | 1.465428         | 1.465078         | 1.464883    |
| 1.465910       | R2               | 1.100122         | 1.100448         | 1.100293         | 1.099784    |
| 1.098703       | R3               | 1.093306         | 1.092687         | 1.092143         | 1.091694    |
| 1.091615       | R4               | 1.092096         | 1.092816         | 1.093424         | 1.094239    |
| 1.094764       | R5               | 1.014466         | 1.014152         | 1.013326         | 1.012434    |
| 1.011462       | R6               | 1.014459         | 1.014124         | 1.013383         | 1.012601    |
| 1.011780       | A1               | 115.086098       | 115.187005       | 115.104682       | 114.882380  |
| 114.423369     | A2               | 109.241572       | 109.177960       | 109.181162       | 109.349236  |
| 109.663360     | A3               | 109.195400       | 109.198352       | 109.329546       | 109.590565  |
| 109.902642     | A4               | 107.626276       | 107.944509       | 108.184914       | 108.305443  |
| 108.235916     |                  |                  |                  |                  |             |



|             |                  |                  |                  |                  |             |
|-------------|------------------|------------------|------------------|------------------|-------------|
| 107.205221  | A5               | 108.238009       | 107.907335       | 107.614940       | 107.312040  |
| 107.134695  | A6               | 107.163512       | 107.127799       | 107.130735       | 107.109761  |
| 112.179201  | A7               | 111.056677       | 111.203613       | 111.494522       | 111.827766  |
| 112.671957  | A8               | 110.773057       | 111.191224       | 111.726613       | 112.260882  |
| 108.737306  | A9               | 106.656234       | 107.192131       | 107.865212       | 108.362961  |
| -90.000259  | D1               | -50.000469       | -60.000414       | -70.000411       | -80.000456  |
| 33.109549   | D2               | 68.328456        | 59.369083        | 50.786500        | 42.048798   |
| 31.818620   | D3               | 71.166356        | 61.603206        | 51.862407        | 41.992800   |
| 154.928428  | D4               | -170.504720      | -179.027297      | 172.649319       | 164.042053  |
| 149.341801  | D5               | -171.930647      | 178.428927       | 168.767856       | 159.119011  |
| -87.548391  | D6               | -53.601722       | -62.201576       | -70.445232       | -78.831735  |
| 90.000259   | D7               | 50.000469        | 60.000414        | 70.000411        | 80.000456   |
|             |                  | 11               | 12               | 13               | 14          |
| 15          | Eigenvalues --   | -0.891651 (1.41) | -0.891058 (1.78) | -0.890809 (1.93) | -0.890991   |
| (1.82)      | -0.891554 (1.47) |                  |                  |                  |             |
| 1.471927    | R1               | 1.467316         | 1.469268         | 1.471137         | 1.472217    |
| 1.092387    | R2               | 1.097395         | 1.095611         | 1.094225         | 1.093069    |
| 1.097300    | R3               | 1.091880         | 1.092646         | 1.093969         | 1.095639    |
| 1.093820    | R4               | 1.095178         | 1.095252         | 1.094923         | 1.094382    |
| 1.013000    | R5               | 1.010818         | 1.010533         | 1.011132         | 1.011984    |
| 1.012749    | R6               | 1.011152         | 1.010734         | 1.011091         | 1.011821    |
| 110.145428  | A1               | 113.767152       | 112.896786       | 111.943240       | 110.978041  |
| 113.449929  | A2               | 110.194075       | 110.845511       | 111.766455       | 112.664644  |
| 110.532932  | A3               | 110.255494       | 110.562561       | 110.690924       | 110.674527  |
| 106.659918  | A4               | 107.984083       | 107.613388       | 107.136963       | 106.812104  |
| 107.957117  | A5               | 107.168283       | 107.330711       | 107.528999       | 107.775940  |
| 107.874768  | A6               | 107.213787       | 107.355478       | 107.546353       | 107.713017  |
| 111.568312  | A7               | 112.413868       | 112.477432       | 112.217803       | 111.905849  |
| 111.041247  | A8               | 112.857756       | 112.759728       | 112.228022       | 111.632971  |
| 106.503481  | A9               | 108.777589       | 108.556867       | 107.810113       | 107.097111  |
| -140.000167 | D1               | -100.000291      | -110.000399      | -120.000353      | -130.000123 |
| -21.357322  | D2               | 23.486398        | 13.166224        | 1.589743         | -9.976460   |
| -20.528492  | D3               | 21.428133        | 10.816797        | 0.193225         | -10.277524  |
| 98.114353   | D4               | 144.914823       | 133.983419       | 121.783322       | 109.746139  |
| 100.785836  | D5               | 139.581885       | 129.747518       | 120.048527       | 110.385334  |
| -140.571319 | D6               | -96.931425       | -107.085859      | -118.361376      | -129.591003 |

|                |    |                  |                  |                  |             |
|----------------|----|------------------|------------------|------------------|-------------|
|                | D7 | 100.000291       | 110.000399       | 120.000353       | 130.000123  |
| 140.000167     |    |                  |                  |                  |             |
|                |    | 16               | 17               | 18               | 19          |
| Eigenvalues -- |    | -0.892328 (0.98) | -0.893093 (0.50) | -0.893655 (0.15) | -0.893888   |
| (0.00)         |    |                  |                  |                  |             |
| R1             |    | 1.470670         | 1.468758         | 1.467005         | 1.465628    |
| R2             |    | 1.092068         | 1.092131         | 1.092334         | 1.092726    |
| R3             |    | 1.098731         | 1.099778         | 1.100299         | 1.100466    |
| R4             |    | 1.093350         | 1.093000         | 1.092860         | 1.092687    |
| R5             |    | 1.013886         | 1.014403         | 1.014507         | 1.014184    |
| R6             |    | 1.013659         | 1.014241         | 1.014417         | 1.014158    |
| A1             |    | 109.472309       | 109.146024       | 109.020077       | 109.167405  |
| A2             |    | 114.107708       | 114.603689       | 114.942778       | 115.176129  |
| A3             |    | 110.303716       | 109.942527       | 109.586372       | 109.190574  |
| A4             |    | 106.739914       | 107.007084       | 107.439268       | 107.853002  |
| A5             |    | 107.999883       | 107.852374       | 107.573512       | 107.193403  |
| A6             |    | 107.993519       | 108.053913       | 108.022671       | 107.968801  |
| A7             |    | 111.260340       | 111.085889       | 111.081993       | 111.156425  |
| A8             |    | 110.609077       | 110.543151       | 110.701854       | 111.111314  |
| A9             |    | 106.177119       | 106.250643       | 106.607582       | 107.127364  |
| D1             |    | -150.000410      | -160.000388      | -170.000418      | 179.999643  |
| D2             |    | -32.244099       | -42.304072       | -51.761676       | -60.796479  |
| D3             |    | -30.468216       | -40.032653       | -49.340826       | -58.531913  |
| D4             |    | 87.288095        | 77.663663        | 68.897917        | 60.671966   |
| D5             |    | 91.295003        | 81.888304        | 72.506846        | 63.105533   |
| D6             |    | -150.948687      | -160.415380      | -169.254412      | -177.690588 |
| D7             |    | 150.000410       | 160.000388       | 170.000418       | -179.999643 |

0 1

C

```

N 1 r2
H 1 r3 2 a3
H 1 r4 2 a4 3 d4
H 1 r5 2 a5 4 d5
H 2 r6 1 a6 3 tw
H 2 r7 1 a7 6 d7

```

r2 1.4656

r3 1.0927

a3 109.18

r4 1.0928

a4 109.17

d4 116.82

r5 1.1003

a5 115.17

d5 121.58

r6 1.0141

a6 111.18

r7 1.0141

a7 111.18

d7 119.37

tw 0.

3 2 1 6 s 18 10.

--Link1--

--Link1--

%mem=2gb

%nprocshared=8

%chk=rot\_barr

#b3lyp/6-311++g\*\* pop=nbo7del nosymm opt=z-matrix

CH3NH2 (tau=0), E(DEL)= -95.846651723 (0.002)

0 1

C

```

N 1 r2
H 1 r3 2 a3
H 1 r4 2 a4 3 d4
H 1 r5 2 a5 4 d5
H 2 r6 1 a6 3 tw
H 2 r7 1 a7 6 d7

```

r2 1.6043

r3 1.0846

a3 108.01

r4 1.0857

a4 105.77

```

d4  119.77
r5  1.0851
a5  107.78
d5  119.80
r6  1.0111
a6  107.16
r7  1.0110
a7  107.14
d7  115.16
tw  0.

$nb0 print=0 $end
$DEL
  Lewis
$END
--Link1--
%mem=2gb
%nprocshared=8
%chk=rot_barr
#b3lyp/6-311++g** pop=nbo7del nosymm opt=z-matrix
CH3NH2 (tau=10), E(DEL)=-95.846644356 (0.01)
0 1
C
N   1   r2
H   1   r3   2   a3
H   1   r4   2   a4   3   d4
H   1   r5   2   a5   4   d5
H   2   r6   1   a6   3   tw
H   2   r7   1   a7   6   d7
r2  1.6042
r3  1.0843
a3  108.15
r4  1.0855
a4  106.04
d4  120.01
r5  1.0857
a5  107.44
d5  119.71
r6  1.0109
a6  107.28
r7  1.0108
a7  107.16
d7  115.34
tw  10.

$nb0 print=0 $end
$DEL
  Lewis
$END
--Link1--
%mem=2gb
%nprocshared=8
%chk=rot_barr
#b3lyp/6-311++g** pop=nbo7del nosymm opt=z-matrix
CH3NH2 (tau=20), E(DEL)= -95.846636374 (0.01)
0 1
C
N   1   r2
H   1   r3   2   a3
H   1   r4   2   a4   3   d4
H   1   r5   2   a5   4   d5
H   2   r6   1   a6   3   tw
H   2   r7   1   a7   6   d7
r2  1.6048
r3  1.0842
a3  108.16
r4  1.0853
a4  106.41
d4  120.16
r5  1.0862
a5  107.15

```

```

d5  119.73
r6  1.0106
a6  107.40
r7  1.0105
a7  107.25
d7  115.54
tw  20.

$nb0 print=0 $end
$DEL
  Lewis
$END
--Link1--
%mem=2gb
%nprocshared=8
%chk=rot_barr
#b3lyp/6-311++g** pop=nbo7del nosymm opt=z-matrix
CH3NH2 (tau=30), E(DEL)=-95.846632640 (0.01)
0 1
C
N   1   r2
H   1   r3   2   a3
H   1   r4   2   a4   3   d4
H   1   r5   2   a5   4   d5
H   2   r6   1   a6   3   tw
H   2   r7   1   a7   6   d7
r2  1.6050
r3  1.0842
a3  108.07
r4  1.0849
a4  106.85
d4  120.30
r5  1.0867
a5  106.90
d5  119.76
r6  1.0102
a6  107.51
r7  1.0101
a7  107.36
d7  115.75
tw  30.

```

```

$nb0 print=0 $end
$DEL
  Lewis
$END
--Link1--
%mem=2gb
%nprocshared=8
%chk=rot_barr
#b3lyp/6-311++g** pop=nbo7del nosymm opt=z-matrix
CH3NH2 (tau=40), E(DEL)=-95.84663238 (0.01)
0 1
C
N   1   r2
H   1   r3   2   a3
H   1   r4   2   a4   3   d4
H   1   r5   2   a5   4   d5
H   2   r6   1   a6   3   tw
H   2   r7   1   a7   6   d7
r2  1.6051
r3  1.0843
a3  107.89
r4  1.0846
a4  107.27
d4  120.40
r5  1.0871
a5  106.74
d5  119.80
r6  1.0099
a6  107.57

```

r7 1.0099  
a7 107.46  
d7 115.89  
tw 40.

\$nbo print=0 \$end

\$DEL

Lewis

\$END

--Link1--

%mem=2gb

%nprocshared=8

%chk=rot\_barr

#b3lyp/6-311++g\*\* pop=nbo7del nosymm opt=z-matrix  
CH3NH2 (tau=50), E(DEL)= -95.846632763 (0.01)

0 1

C

N 1 r2  
H 1 r3 2 a3  
H 1 r4 2 a4 3 d4  
H 1 r5 2 a5 4 d5  
H 2 r6 1 a6 3 tw  
H 2 r7 1 a7 6 d7

r2 1.6051

r3 1.0844

a3 107.63

r4 1.0844

a4 107.64

d4 120.45

r5 1.0872

a5 106.68

d5 119.85

r6 1.0098

a6 107.56

r7 1.0098

a7 107.54

d7 115.94

tw 50.

\$nbo print=0 \$end

\$DEL

Lewis

\$END

--Link1--

%mem=2gb

%nprocshared=8

%chk=rot\_barr

#b3lyp/6-311++g\*\* pop=nbo7del nosymm opt=z-matrix  
CH3NH2 (tau=60), E(DEL)=-95.846632611 (0.01)

0 1

C

N 1 r2  
H 1 r3 2 a3  
H 1 r4 2 a4 3 d4  
H 1 r5 2 a5 4 d5  
H 2 r6 1 a6 3 tw  
H 2 r7 1 a7 6 d7

r2 1.6052

r3 1.0847

a3 107.30

r4 1.0842

a4 107.92

d4 120.44

r5 1.0872

a5 106.72

d5 119.91

r6 1.0098

a6 107.50

r7 1.0099

a7 107.56

d7 115.89

```

tw 60.

$nb0 print=0 $end
$DEL
  Lewis
$END
--Link1--
%mem=2gb
%nprocshared=8
%chk=rot_barr
#b3lyp/6-311++g** pop=nbo7del nosymm opt=z-matrix
CH3NH2 (tau=70), E(DEL)=-95.846632500 (0.01)
0 1
C
N 1 r2
H 1 r3 2 a3
H 1 r4 2 a4 3 d4
H 1 r5 2 a5 4 d5
H 2 r6 1 a6 3 tw
H 2 r7 1 a7 6 d7
r2 1.6052
r3 1.0849
a3 106.92
r4 1.0841
a4 108.10
d4 120.38
r5 1.0869
a5 106.84
d5 119.98
r6 1.0101
a6 107.40
r7 1.0102
a7 107.51
d7 115.74
tw 70.

```

```

$nb0 print=0 $end
$DEL
  Lewis
$END
--Link1--
%mem=2gb
%nprocshared=8
%chk=rot_barr
#b3lyp/6-311++g** pop=nbo7del nosymm opt=z-matrix
CH3NH2 (tau=80), E(DEL)=-95.846634570 (0.01)
0 1
C
N 1 r2
H 1 r3 2 a3
H 1 r4 2 a4 3 d4
H 1 r5 2 a5 4 d5
H 2 r6 1 a6 3 tw
H 2 r7 1 a7 6 d7
r2 1.6050
r3 1.0852
a3 106.53
r4 1.0841
a4 108.19
d4 120.28
r5 1.0865
a5 107.04
d5 120.07
r6 1.0104
a6 107.29
r7 1.0105
a7 107.41
d7 115.55
tw 80.

```

```

$nb0 print=0 $end

```

```

$DEL
  Lewis
$END
--Link1--
%mem=2gb
%nprocshared=8
%chk=rot_barr
#b3lyp/6-311++g** pop=nbo7del nosymm opt=z-matrix
CH3NH2 (tau=90), E(DEL)=-95.846640184 (0.01)
0 1
C
N   1   r2
H   1   r3   2   a3
H   1   r4   2   a4   3   d4
H   1   r5   2   a5   4   d5
H   2   r6   1   a6   3   tw
H   2   r7   1   a7   6   d7
r2  1.6048
r3  1.0854
a3  106.18
r4  1.0842
a4  108.20
d4  120.17
r5  1.0860
a5  107.29
d5  120.17
r6  1.0107
a6  107.19
r7  1.0108
a7  107.29
d7  115.37
tw  90.

```

```

$nbo print=0 $end
$DEL
  Lewis
$END
--Link1--
%mem=2gb
%nprocshared=8
%chk=rot_barr
#b3lyp/6-311++g** pop=nbo7del nosymm opt=z-matrix
CH3NH2 (tau=100), E(DEL)=-95.846640184 (0.01)
0 1
C
N   1   r2
H   1   r3   2   a3
H   1   r4   2   a4   3   d4
H   1   r5   2   a5   4   d5
H   2   r6   1   a6   3   tw
H   2   r7   1   a7   6   d7
r2  1.6048
r3  1.0854
a3  106.18
r4  1.0842
a4  108.20
d4  120.17
r5  1.0860
a5  107.29
d5  120.17
r6  1.0107
a6  107.19
r7  1.0108
a7  107.29
d7  115.37
tw  100.

```

```

$nbo print=0 $end
$DEL
  Lewis
$END

```

```

--Link1--
%mem=2gb
%nprocshared=8
%chk=rot_barr
#b3lyp/6-311++g** pop=nbo7del nosymm opt=z-matrix
CH3NH2 (tau=110), E(DEL)=-95.846648413 (0.00)
0 1
C
N 1 r2
H 1 r3 2 a3
H 1 r4 2 a4 3 d4
H 1 r5 2 a5 4 d5
H 2 r6 1 a6 3 tw
H 2 r7 1 a7 6 d7
r2 1.6045
r3 1.0855
a3 105.91
r4 1.0844
a4 108.14
d4 120.06
r5 1.0855
a5 107.96
d5 120.25
r6 1.0110
a6 107.13
r7 1.0111
a7 107.19
d7 115.21
tw 110.

```

```

$nb0 print=0 $end
$DEL

```

Lewis

```

$END

```

```

--Link1--
%mem=2gb
%nprocshared=8
%chk=rot_barr
#b3lyp/6-311++g** pop=nbo7del nosymm opt=z-matrix
CH3NH2 (tau=120), E(DEL)=-95.846653476 (0.00)
0 1
C
N 1 r2
H 1 r3 2 a3
H 1 r4 2 a4 3 d4
H 1 r5 2 a5 4 d5
H 2 r6 1 a6 3 tw
H 2 r7 1 a7 6 d7
r2 1.6043
r3 1.0856
a3 105.77
r4 1.0848
a4 107.98
d4 119.96
r5 1.0851
a5 107.80
d5 120.28
r6 1.0111
a6 107.12
r7 1.0111
a7 107.12
d7 115.14
tw 120.

```

```

$nb0 print=0 $end
$DEL

```

Lewis

```

$END

```

```

--Link1--

```

```

%mem=2gb

```

```

%nprocshared=8

```



```

%chk=rot_barr
#b3lyp/6-311++g** pop=nbo7del nosymm opt=z-matrix
CH3NH2 (tau=130), E(DEL)=-95.846651417 (0.00)
0 1
C
N 1 r2
H 1 r3 2 a3
H 1 r4 2 a4 3 d4
H 1 r5 2 a5 4 d5
H 2 r6 1 a6 3 tw
H 2 r7 1 a7 6 d7
r2 1.6043
r3 1.0856
a3 105.82
r4 1.0852
a4 107.75
d4 119.88
r5 1.0847
a5 107.99
d5 120.25
r6 1.0111
a6 107.17
r7 1.0111
a7 107.11
d7 115.17
tw 130.

```

```

$nbo print=0 $end
$DEL
Lewis
$END
--Link1--
%mem=2gb
%nprocshared=8
%chk=rot_barr
#b3lyp/6-311++g** pop=nbo7del nosymm opt=z-matrix
CH3NH2 (tau=150), E(DEL)=-95.846636303 (0.01)
0 1
C
N 1 r2
H 1 r3 2 a3
H 1 r4 2 a4 3 d4
H 1 r5 2 a5 4 d5
H 2 r6 1 a6 3 tw
H 2 r7 1 a7 6 d7
r2 1.6047
r3 1.0852
a3 106.38
r4 1.0863
a4 107.18
d4 119.78
r5 1.0842
a5 108.14
d5 120.04
r6 1.0106
a6 107.39
r7 1.0105
a7 107.24
d7 115.51
tw 150.

```

```

$nbo print=0 $end
$DEL
Lewis
$END
--Link1--
%mem=2gb
%nprocshared=8
%chk=rot_barr
#b3lyp/6-311++g** pop=nbo7del nosymm opt=z-matrix
CH3NH2 (tau=160), E(DEL)=-95.846632843 (0.01)

```

```

0 1
C
N 1 r2
H 1 r3 2 a3
H 1 r4 2 a4 3 d4
H 1 r5 2 a5 4 d5
H 2 r6 1 a6 3 tw
H 2 r7 1 a7 6 d7
r2 1.6049
r3 1.0849
a3 106.78
r4 1.0868
a4 106.94
d4 119.74
r5 1.0841
a5 108.09
d5 119.92
r6 1.0103
a6 107.50
r7 1.0102
a7 107.35
d7 115.73
tw 160.

$nb0 print=0 $end
$DEL
Lewis
$END
--Link1--
%mem=2gb
%nprocshared=8
%chk=rot_barr
#b3lyp/6-311++g** pop=nbo7del nosymm opt=z-matrix
CH3NH2 (tau=170), E(DEL)=-95.846632652 (0.01)
0 1
C
N 1 r2
H 1 r3 2 a3
H 1 r4 2 a4 3 d4
H 1 r5 2 a5 4 d5
H 2 r6 1 a6 3 tw
H 2 r7 1 a7 6 d7
r2 1.6049
r3 1.0847
a3 107.19
r4 1.0872
a4 106.77
d4 119.72
r5 1.0842
a5 107.94
d5 119.83
r6 1.0100
a6 107.58
r7 1.099
a7 107.47
d7 115.91
tw 170.

$nb0 print=0 $end
$DEL
Lewis
$END
--Link1--
%mem=2gb
%nprocshared=8
%chk=rot_barr
#b3lyp/6-311++g** pop=nbo7del nosymm opt=z-matrix
CH3NH2 (tau=180), E(DEL)=-95.846633379 (0.01)
0 1
C
N 1 r2

```

```

H 1 r3 2 a3
H 1 r4 2 a4 3 d4
H 1 r5 2 a5 4 d5
H 2 r6 1 a6 3 tw
H 2 r7 1 a7 6 d7
r2 1.6047
r3 1.0844
a3 107.58
r4 1.0873
a4 106.68
d4 119.71
r5 1.0843
a5 107.73
d5 119.75
r6 1.0097
a6 107.61
r7 1.0097
a7 107.59
d7 116.08
tw 180.

$nb0 print=0 $end
$DEL
Lewis
$END
--Link1--
--Link1--
%mem=2gb
%nprocshared=8
%chk=rot_barr
#b3lyp/6-311++g** pop=nb07read nosymm opt=z-matrix freq
HCONH2, E(full)=-169.954848506
nu:233,568,635,...
Vibrational temperatures: 335.43 817.38 913.54 1492.61 1515.05
(Kelvin) 1815.98 2038.15 2328.27 2577.26 4238.56
5148.90 5345.83

Zero-point correction= 0.045233 (Hartree/Particle)
Thermal correction to Energy= 0.048983
Thermal correction to Enthalpy= 0.049927
Thermal correction to Gibbs Free Energy= 0.020701
Sum of electronic and zero-point Energies= -169.909615
Sum of electronic and thermal Energies= -169.905866
Sum of electronic and thermal Enthalpies= -169.904922
Sum of electronic and thermal Free Energies= -169.934148
0 1
H
C 1 r2
O 2 r3 1 a3
N 2 r4 1 a4 3 d4
H 4 r5 2 a5 3 d5
H 4 r6 2 a6 3 d6
r2 1.1059
r3 1.2115
a3 122.69
r4 1.3610
a4 112.38
d4 180.00
r5 1.0093
a5 119.42
d5 0.00
r6 1.0067
a6 121.42
d6 180.00
$nb0 file=hconh2 $end
--Link1--
--Link1--
%mem=2gb
%nprocshared=8
%chk=rot_barr
#b3lyp/6-311++g** pop=nb07del nosymm freq
HCONH2, E(DEL)=-169.769538009

```

nu: 197,500,835,...

Vibrational temperatures: 282.81 719.63 1200.96 1427.56 1672.33  
(Kelvin) 1862.03 2054.75 2545.64 2635.60 5228.67  
5239.23 5281.13

Zero-point correction= 0.047740 (Hartree/Particle)  
Thermal correction to Energy= 0.051510  
Thermal correction to Enthalpy= 0.052454  
Thermal correction to Gibbs Free Energy= 0.022881  
Sum of electronic and zero-point Energies= -169.721798  
Sum of electronic and thermal Energies= -169.718028  
Sum of electronic and thermal Enthalpies= -169.717084  
Sum of electronic and thermal Free Energies= -169.746657

0 1

H

C 1 r2  
O 2 r3 1 a3  
N 2 r4 1 a4 3 d4  
H 4 r5 2 a5 3 d5  
H 4 r6 2 a6 3 d6

r2 1.0478

r3 1.3037

a3 117.59

r4 1.5411

a4 128.20

d4 179.82

r5 1.0131

a5 106.08

d5 56.12

r6 1.0131

a6 106.16

d6 303.08

\$nbo print=0 \$end

\$DEL

Lewis

\$END

--Link1--

--Link1--

%mem=2gb

%nprocshared=8

%chk=rot\_barr

#b3lyp/6-311++g\*\* nosymm pop=nbo7read opt=modredundant

HCONH2, E(full)=-169.954848506

Summary of Optimized Potential Surface Scan (add -169.0 to energies):

|                         | 1                | 2                | 3                | 4           |
|-------------------------|------------------|------------------|------------------|-------------|
| 5                       |                  |                  |                  |             |
| Eigenvalues --          | -0.954849 (0.00) | -0.954688 (0.10) | -0.954021 (0.52) | -0.952580   |
| (1.42) -0.950276 (2.87) |                  |                  |                  |             |
| R1                      | 1.105900         | 1.106040         | 1.106197         | 1.106500    |
| 1.106946                |                  |                  |                  |             |
| R2                      | 1.211500         | 1.211373         | 1.210798         | 1.209402    |
| 1.208164                |                  |                  |                  |             |
| R3                      | 1.361000         | 1.362785         | 1.367284         | 1.373444    |
| 1.379757                |                  |                  |                  |             |
| R4                      | 1.009300         | 1.009728         | 1.010965         | 1.012046    |
| 1.013033                |                  |                  |                  |             |
| R5                      | 1.006700         | 1.007359         | 1.008922         | 1.010554    |
| 1.012133                |                  |                  |                  |             |
| A1                      | 122.690000       | 122.649436       | 122.490422       | 122.369331  |
| 122.130860              |                  |                  |                  |             |
| A2                      | 112.380000       | 112.385256       | 112.519924       | 112.556113  |
| 112.669768              |                  |                  |                  |             |
| A3                      | 124.930000       | 124.941054       | 124.884813       | 124.840177  |
| 124.806521              |                  |                  |                  |             |
| A4                      | 119.420000       | 118.847886       | 117.638714       | 116.737063  |
| 116.064576              |                  |                  |                  |             |
| A5                      | 121.420000       | 120.529627       | 118.792788       | 116.812490  |
| 114.925973              |                  |                  |                  |             |
| A6                      | 119.160000       | 118.346865       | 116.511102       | 114.333219  |
| 112.149333              |                  |                  |                  |             |
| D1                      | 180.000000       | -171.757085      | -163.656455      | -155.469287 |
| -147.090356             |                  |                  |                  |             |

|                           |    |                   |                   |                   |             |
|---------------------------|----|-------------------|-------------------|-------------------|-------------|
| -13.449826                | D2 | 0.000000          | -9.168882         | -14.030585        | -14.975499  |
| 39.999919                 | D3 | 0.000000          | 9.999944          | 20.000035         | 29.999896   |
| 173.640449                | D4 | 180.000000        | 172.588147        | 169.625905        | 170.493683  |
| 10                        |    | 6                 | 7                 | 8                 | 9           |
| Eigenvalues --            |    | -0.947171 (4.82)  | -0.943417 (7.17)  | -0.939236 (9.80)  | -0.934900   |
| (12.52) -0.930735 (15.13) |    |                   |                   |                   |             |
| 1.109073                  | R1 | 1.107214          | 1.107922          | 1.108087          | 1.108673    |
| 1.200156                  | R2 | 1.207001          | 1.205406          | 1.203846          | 1.202066    |
| 1.420985                  | R3 | 1.386917          | 1.394380          | 1.403201          | 1.411856    |
| 1.018596                  | R4 | 1.014063          | 1.014985          | 1.016149          | 1.017341    |
| 1.019410                  | R5 | 1.013638          | 1.015001          | 1.016562          | 1.017957    |
| 120.831305                | A1 | 121.822284        | 121.516813        | 121.245516        | 120.984666  |
| 114.936617                | A2 | 112.939107        | 113.237124        | 113.710003        | 114.287128  |
| 123.685324                | A3 | 124.693460        | 124.580711        | 124.332968        | 124.051463  |
| 112.341871                | A4 | 115.483566        | 115.035854        | 114.323541        | 113.469388  |
| 108.151445                | A5 | 113.261434        | 111.692866        | 110.293645        | 109.135268  |
| 103.993102                | A6 | 110.105639        | 108.195738        | 106.495485        | 105.068955  |
| -98.439646                | D1 | -138.367738       | -129.262461       | -119.594959       | -109.376377 |
| 15.756387                 | D2 | -10.096850        | -5.433397         | 0.363257          | 7.409102    |
| 89.999946                 | D3 | 49.999892         | 59.999949         | 69.999924         | 79.999925   |
| -155.804021               | D4 | 178.270780        | -176.170987       | -170.041860       | -163.214596 |
| 15                        |    | 11                | 12                | 13                | 14          |
| Eigenvalues --            |    | -0.927102 (17.41) | -0.924386 (19.12) | -0.923009 (19.98) | -0.948861   |
| (3.76) -0.951390 (2.17)   |    |                   |                   |                   |             |
| 1.105380                  | R1 | 1.109845          | 1.110187          | 1.110557          | 1.104925    |
| 1.209314                  | R2 | 1.198088          | 1.196485          | 1.195526          | 1.208549    |
| 1.377989                  | R3 | 1.429746          | 1.436280          | 1.439509          | 1.384760    |
| 1.011768                  | R4 | 1.019984          | 1.020775          | 1.020187          | 1.013360    |
| 1.014340                  | R5 | 1.020623          | 1.021369          | 1.020325          | 1.016016    |
| 122.503250                | A1 | 120.739184        | 120.688562        | 120.626715        | 122.403678  |
| 112.551720                | A2 | 115.585880        | 116.148056        | 116.471529        | 112.656334  |
| 124.944971                | A3 | 123.324611        | 123.017909        | 122.893466        | 124.932969  |
| 116.666999                | A4 | 110.934833        | 109.691033        | 109.052342        | 115.429402  |
| 113.475380                | A5 | 107.526080        | 107.424846        | 108.500318        | 111.624592  |
| 112.812846                | A6 | 103.403576        | 103.489385        | 105.016659        | 110.724868  |
| -39.913640                | D1 | -86.764170        | -74.363629        | -61.042867        | -49.052516  |
| -173.634263               | D2 | 25.636826         | 37.474820         | 52.823699         | -176.641794 |

|                | D3               | 99.999946        | 109.999913       | 119.999960  | 130.000032 |
|----------------|------------------|------------------|------------------|-------------|------------|
| 139.999997     | D4               | -147.599058      | -138.161638      | -126.133473 | 2.410754   |
| 6.279374       |                  |                  |                  |             |            |
| Eigenvalues -- | 16               | 17               | 18               | 19          |            |
| (0.00)         | -0.953181 (1.05) | -0.954249 (0.38) | -0.954731 (0.07) | -0.954848   |            |
| R1             | 1.105565         | 1.105835         | 1.106021         | 1.105965    |            |
| R2             | 1.210302         | 1.210839         | 1.211562         | 1.211742    |            |
| R3             | 1.371835         | 1.366665         | 1.362379         | 1.360805    |            |
| R4             | 1.010004         | 1.008486         | 1.007103         | 1.006616    |            |
| R5             | 1.012584         | 1.010993         | 1.009622         | 1.009141    |            |
| A1             | 122.599110       | 122.637282       | 122.658345       | 122.683609  |            |
| A2             | 112.547029       | 112.473229       | 112.409514       | 112.381861  |            |
| A3             | 124.850497       | 124.881378       | 124.926642       | 124.934530  |            |
| A4             | 118.071492       | 119.474162       | 120.746255       | 121.384993  |            |
| A5             | 115.291711       | 117.247329       | 118.767243       | 119.475501  |            |
| A6             | 114.985604       | 116.944192       | 118.569032       | 119.139360  |            |
| D1             | -30.654510       | -21.016047       | -10.836557       | 0.004907    |            |
| D2             | -172.048659      | -172.238940      | -174.854819      | -179.854523 |            |
| D3             | 150.000061       | 160.000065       | 170.000061       | -179.999974 |            |
| D4             | 8.605911         | 8.777172         | 5.981799         | 0.140596    |            |

```

0 1
H
C 1 r2
O 2 r3 1 a3
N 2 r4 1 a4 3 d4
H 4 r5 2 a5 3 d5
H 4 r6 2 a6 3 d6
r2 1.1059
r3 1.2115
a3 122.69
r4 1.3610
a4 112.38
d4 180.00
r5 1.0093
a5 119.42
d5 0.00
r6 1.0067
a6 121.42
d6 180.00
3 2 4 5 S 18 10.
$nb0 file=hconh2 archive $end
--Link1--
--Link1-

```

## STERIC REPULSIONS

```

%mem=2gb
%nprocshared=8
%chk=he_he
#b3lyp/6-311++g** pop=nb07read
He...He (R=5), -5.82708671068 (dE=0.00)
0 1
He
He 1 5.
$nb0 file=he_he_5 archive steric $end
--Link1--
%mem=2gb
%nprocshared=8
%chk=he_he
#b3lyp/6-311++g** pop=nb07read
He...He (R=4), -5.82707721566 (dE=0.007)
0 1
He
He 1 4.
$nb0 file=he_he_4 archive steric $end
--Link1--
%mem=2gb
%nprocshared=8
%chk=he_he

```

```

#b3lyp/6-311++g** pop=nbo7read
He...He (R=3), -5.82701220107 (dE=0.05)
0 1
He
He 1 3.
$nb0 file=he_he_3 archive steric $end
--Link1--
%mem=2gb
%nprocshared=8
%chk=he_he
#b3lyp/6-311++g** pop=nbo7read
He...He (R=2), -5.82522970796 (dE=1.17)
0 1
He
He 1 2.
$nb0 file=he_he_2 archive steric $end
--Link1--
%mem=2gb
%nprocshared=8
%chk=he_he
#b3lyp/6-311++g** pop=nbo7read
He...He (R=1), -5.68164563835 (dE=91.27)
0 1
He
He 1 1.
$nb0 file=he_he_1 archive steric $end
--Link1--
%mem=2gb
%nprocshared=8
%chk=chfchf_cis
#b3lyp/6-311++g** pop=nbo7read opt freq
cis-CHF=CHF (C2v), -277.142846492 (dE=0.00 kcal/mol)
nu: 236,510,771,...
Vibrational temperatures: 340.26 733.63 1108.84 1115.38 1250.73
(Kelvin) 1452.32 1617.68 1842.23 1987.87 2526.19
4626.36 4659.17

Zero-point correction= 0.036831 (Hartree/Particle)
Thermal correction to Energy= 0.040700
Thermal correction to Enthalpy= 0.041644
Thermal correction to Gibbs Free Energy= 0.011166
Sum of electronic and zero-point Energies= -277.106015
Sum of electronic and thermal Energies= -277.102147
Sum of electronic and thermal Enthalpies= -277.101202
Sum of electronic and thermal Free Energies= -277.131681
0 1
C
C 1 1.3238
H 1 1.0810 2 122.96
F 1 1.3432 2 122.62 3 180.
H 2 1.0810 1 122.96 3 0.
F 2 1.3432 1 122.62 3 180.
$nb0 file=chfchf_cis archive nrt plot steric $end
--Link1--
%mem=2gb
%nprocshared=8
%chk=chfchf_trans
#b3lyp/6-311++g** pop=nbo7read opt freq
trans-CHF=CHF (C2h), -277.141563885 (dE=0.80 kcal/mol)
nu: 317,334,551,...
Vibrational temperatures: 456.51 480.63 793.18 1185.63 1300.77
(Kelvin) 1628.85 1653.17 1851.01 1874.46 2504.93
4635.61 4646.00

Zero-point correction= 0.036435 (Hartree/Particle)
Thermal correction to Energy= 0.040427
Thermal correction to Enthalpy= 0.041371
Thermal correction to Gibbs Free Energy= 0.010939
Sum of electronic and zero-point Energies= -277.105129
Sum of electronic and thermal Energies= -277.101137
Sum of electronic and thermal Enthalpies= -277.100193
Sum of electronic and thermal Free Energies= -277.130625
0 1

```

```

C
C 1 1.3234
H 1 1.0813 2 125.70
F 1 1.3499 2 120.01 3 180.
H 2 1.0813 1 125.70 3 180.
F 2 1.3499 1 120.01 3 0.
$nb0 file=chfchf_trans archive nrt plot steric $end
--Link1--
%mem=2gb
%nprocshared=8
%chk=cis_2_butene_rb
#b3lyp/6-311++G** pop=nbo7read
cis_2_butene methyl rotation, E(tau=0)=-157.272643068 (dE=0.00)
Total steric exchange energy: 135.22 kcal/mol
dE(SXE)=2.01
dE(SXE;i,j)=2.06
0 1
        6      0.000000      1.590550      -0.521941
        6      0.000000      0.667983      0.663470
        6     -0.000000     -0.667983      0.663470
        1      0.000000      1.060210     -1.475268
        1     -0.878256      2.245715     -0.502836
        1      0.878256      2.245715     -0.502836
        1      0.000000      1.165182      1.631762
        1     -0.000000     -1.165182      1.631762
        6     -0.000000     -1.590550     -0.521941
        1     -0.000000     -1.060210     -1.475268
        1      0.878256     -2.245715     -0.502836
        1     -0.878256     -2.245715     -0.502836
$nb0 file=cis_2_butene_0 archive steric nrt plot $end
--Link1--
%mem=2gb
%nprocshared=8
%chk=cis_2_butene_rb
#b3lyp/6-311++G** pop=nbo7read
cis_2_butene methyl rotation, E(tau=10)=-157.272543650 (dE=0.06)
Total steric exchange energy: 135.13 kcal/mol
dE(SXE)=1.92
dE(SXE;i,j)=2.01
0 1
        6      1.589478     -0.522182      0.000621
        6      0.667862      0.664514     -0.004684
        6     -0.668169      0.664048      0.000502
        1      1.068902     -1.466558     -0.164703
        1      2.350729     -0.422014     -0.780286
        1      2.126825     -0.595161      0.953478
        1      1.164573      1.632781      0.005117
        1     -1.165879      1.631916      0.005330
        6     -1.589091     -0.522555     -0.000207
        1     -1.057295     -1.474767     -0.020574
        1     -2.228099     -0.516279      0.890149
        1     -2.260238     -0.492870     -0.865899
$nb0 file=cis_2_butene_10 archive steric nrt plot $end
--Link1--
%mem=2gb
%nprocshared=8
%chk=cis_2_butene_rb
#b3lyp/6-311++G** pop=nbo7read
cis_2_butene methyl rotation, E(tau=20)=-157.272268007 (dE=0.24)
Total steric exchange energy: 134.81 kcal/mol
dE(SXE)=1.60
dE(SXE;i,j)=1.87
0 1
        6      1.585613     -0.523088      0.001047
        6      0.667337      0.667895     -0.008226
        6     -0.668600      0.666167      0.000871
        1      1.093857     -1.440283     -0.327651
        1      2.440885     -0.354096     -0.660499
        1      1.993525     -0.698865      1.003585
        1      1.163762      1.635958      0.009250
        1     -1.168780      1.632661      0.009746

```



```

        6          -1.584069   -0.524527   -0.000485
        1          -1.046981   -1.473282   -0.039480
        1          -2.208401   -0.532613    0.900336
        1          -2.269550   -0.488162   -0.854525
$nb0 file=cis_2_butene_20 archive steric nrt plot $end
--Link1--
%mem=2gb
%nprocshared=8
%chk=cis_2_butene_rb
#b3lyp/6-311++G** pop=nbo7read
cis_2_butene methyl rotation, E(tau=30)=-157.271883143 (dE=0.48)
Total steric exchange energy: 134.31 kcal/mol
dE(SXE)=1.10
dE(SXE;i,j)=1.65
0 1
        6          1.579485   -0.524684    0.001142
        6          0.666776    0.673153   -0.009334
        6         -0.669044    0.669391    0.000872
        1          1.136176   -1.395288   -0.486859
        1          2.513951   -0.300051   -0.520365
        1          1.848378   -0.813352    1.024027
        1          1.162982    1.640758    0.012225
        1         -1.173127    1.633808    0.010987
        6         -1.576331   -0.527371   -0.000709
        1         -1.031286   -1.471305   -0.049761
        1         -2.192169   -0.546216    0.905921
        1         -2.270223   -0.491288   -0.847994
$nb0 file=cis_2_butene_30 archive steric nrt plot $end
--Link1--
%mem=2gb
%nprocshared=8
%chk=cis_2_butene_rb
#b3lyp/6-311++G** pop=nbo7read
cis_2_butene methyl rotation, E(tau=40)=-157.271489489 (dE=0.72)
Total steric exchange energy: 133.77 kcal/mol
dE(SXE)=0.56
dE(SXE;i,j)=1.32
0 1
        6          1.571893   -0.526597    0.000890
        6          0.665924    0.679087   -0.007938
        6         -0.669708    0.673593    0.000686
        1          1.199497   -1.332706   -0.636439
        1          2.568619   -0.262233   -0.360336
        1          1.694462   -0.931719    1.012000
        1          1.162707    1.646138    0.010767
        1         -1.178162    1.635501    0.010241
        6         -1.566859   -0.530810   -0.000814
        1         -1.011167   -1.468625   -0.050413
        1         -2.182764   -0.556492    0.905582
        1         -2.260693   -0.501505   -0.848344
$nb0 file=cis_2_butene_40 archive steric nrt plot $end
--Link1--
%mem=2gb
%nprocshared=8
%chk=cis_2_butene_rb
#b3lyp/6-311++G** pop=nbo7read
cis_2_butene methyl rotation, E(tau=50)=-157.271200474 (dE=0.91)
Total steric exchange energy: 133.38 kcal/mol
dE(SXE)=0.17
dE(SXE;i,j)=0.94
0 1
        6          1.565698   -0.527991    0.000352
        6          0.665181    0.684119   -0.004359
        6         -0.670213    0.676916    0.000082
        1          1.286529   -1.252591   -0.770293
        1          2.602853   -0.241236   -0.184857
        1          1.541353   -1.049099    0.963838
        1          1.162322    1.650678    0.007353
        1         -1.182891    1.636592    0.005691
        6         -1.558634   -0.533606   -0.000513
        1         -0.994296   -1.467204   -0.033383

```

```

1          -2.187877  -0.554624   0.896841
1          -2.240189  -0.519146  -0.858559
$nb0 file=cis_2_butene_50 archive steric nrt plot $end
--Link1--
%mem=2gb
%nprocshared=8
%chk=cis_2_butene_rb
#b3lyp/6-311++G** pop=nbo7read
cis_2_butene methyl rotation, E(tau=60)=-157.271092891 (dE=0.97)
Total steric exchange energy: 133.21 kcal/mol
dE(SXE)=0.00
dE(SXE;i,j)=0.56
0 1
6          1.563242  -0.528484   0.000012
6          0.664998   0.686084  -0.000089
6         -0.670311   0.678434   0.000055
1          1.398197  -1.159612  -0.879432
1          2.614775  -0.235447  -0.002794
1          1.402029  -1.156412   0.882483
1          1.162543   1.652444  -0.000050
1         -1.184448   1.637244   0.000183
6         -1.555282  -0.534665  -0.000023
1         -0.987068  -1.466519  -0.001014
1         -2.210301  -0.540559   0.878703
1         -2.211608  -0.539351  -0.877812
$nb0 file=cis_2_butene_60 archive steric nrt plot $end
--Link1--
--Link1--
%mem=2gb
%nprocshared=8
%chk=cis_2_butene_rb
#b3lyp/6-311++G** opt=modredundant
cis_2_butene methyl rotation, E(tau)
0 1
C
C 1 r2
C 2 r3 1 a3
H 1 r4 2 a4 3 tau
H 1 r5 2 a5 4 tw5
H 1 r6 2 a6 4 tw6
H 2 r7 1 a7 3 d7
H 3 r8 2 a8 7 d8
C 3 r9 2 a9 7 d9
H 9 r10 3 a10 2 d10
H 9 r11 3 a11 10 d11
H 9 r12 3 a12 10 d12
r2 1.5
r3 1.3
a3 120.
r4 1.
a4 110.
tau 0.
r5 1.
a5 110.
tw5 120.
r6 1.
a6 110.
tw6 -120.
r7 1.
a7 120.
d7 180.
r8 1.
a8 120.
d8 0.
r9 1.5
a9 120.
d9 180.
r10 1.
a10 110.
d10 0.
r11 1.

```

```
a11 110.  
d11 120.  
r12 1.  
a12 110.  
d12 -120.  
3 2 1 4 S 6 10.  
$nbo file-propene steric nrt $end  
--Link1--  
--Link1--
```
